# Supplementary material for: Synthesis of interstellar propen-2-ol (CH3C(OH)CH2) – the simplest enol tautomer of a ketone
Source: Royal Society of Chemistry journal article supplement (doi:10.1039/d3cp02307a), 2023-01-01
Supplement: d3cp02307a1.pdf [file d3cp02307a1.pdf]

## Supporting Information for

### Synthesis of Interstellar Propen-2-ol ( $\text{CH}_3\text{C}(\text{OH})\text{CH}_2$ ) – The Simplest Enol Tautomer of a Ketone

Jia Wang,<sup>1,2</sup> Anatoliy A. Nikolayev,<sup>3</sup> Chaojiang Zhang,<sup>1,2</sup> Joshua H. Marks,<sup>1,2</sup> Valeriy N. Azyazov,<sup>4</sup> André K. Eckhardt,<sup>5,\*</sup> Alexander M. Mebel<sup>6,\*</sup> Ralf I. Kaiser<sup>1,2,\*</sup>

<sup>1</sup> *Department of Chemistry, University of Hawaii at Manoa, Honolulu, HI 96822, USA*

<sup>2</sup> *W. M. Keck Research Laboratory in Astrochemistry, University of Hawaii at Manoa, Honolulu, HI 96822, USA*

<sup>3</sup> *Samara National Research University, Samara 443086, Russia*

<sup>4</sup> *Lebedev Physical Institute, Samara 443011, Russia*

<sup>5</sup> *Lehrstuhl für Organische Chemie II, Ruhr-Universität Bochum, Bochum 44801, Germany*

<sup>6</sup> *Department of Chemistry and Biochemistry, Florida International University, Miami, Florida 33199, USA*

\*Corresponding Author: [Andre.Eckhardt@ruhr-uni-bochum.de](mailto:Andre.Eckhardt@ruhr-uni-bochum.de), [mebela@fiu.edu](mailto:mebela@fiu.edu),  
[ralfk@hawaii.edu](mailto:ralfk@hawaii.edu)

## Ion signal of higher masses and assignment

After the irradiation, several higher mass-to-charge ratios were observed at 9.43 eV, which were not present in the blank experiment. The ion signals at  $m/z = 72, 86, 100, 114, 116,$  and  $158$  in irradiated acetone ice shift to  $m/z = 80, 92, 108, 124, 128,$  and  $172$  in irradiated acetone- $d_6$  ice respectively (Figs. S1 and S4), confirming their respective formulae  $C_4H_8O, C_4H_6O_2, C_5H_8O_2, C_6H_{10}O_2, C_6H_{12}O_2,$  and  $C_8H_{14}O_3$ . Note that formula  $C_{12}H_{14}$  is unlikely to be assigned to the signal at  $m/z = 158$  due to the small dose ( $0.34 \pm 0.05$  eV molecule $^{-1}$ ) used in the experiment. The tentatively assigned molecules are listed in Table S7 and the proposed pathways for their formation are shown in Figs. S5 and S6. Upon irradiation, the acetyl radical (**7**,  $CH_3\dot{C}O$ ), acetonyl radical (**8**,  $CH_3CO\dot{C}H_2$ ) or methyl radical (**9**,  $\dot{C}H_3$ ) can be produced via carbon-carbon single bond cleavage or H atom loss by acetone (**1**). Radical-radical reactions of two acetyl radicals (**7**) or two acetonyl radicals (**8**) can lead to the formation of 2,3-butanedione (**10**,  $C_4H_6O_2$ ; IE = 9.20 – 9.27 eV) or 2,5-hexanedione (**11**,  $C_6H_{10}O_2$ ). Our recent work demonstrated the recombination of two acetyl radicals (**7**) forms 2,3-butanedione (**10**) in irradiated acetaldehyde ice.<sup>1</sup> The recombination of **7** and **8** radicals can form 2,4-pentanedione (**12**,  $C_5H_8O_2$ ; IE = 8.80 – 8.84 eV). Similarly, 2-butanone (**13**,  $C_4H_8O$ ; IE = 9.45 – 9.53 eV) can be formed from the recombination reaction between acetonyl radical (**8**) and methyl radical (**9**). The ionization of 2-butanone (**13**) is possible as the lower limit of its ionization energy is only 0.02 eV higher than the energy of the ionizing photon (9.43 eV). Because the hydroxy (OH) group of propen-2-ol (**2**) is nucleophilic and the carbon of the carbonyl group (C=O) of acetone (**1**) or 2,4-pentanedione (**12**) acts as an electrophile, propen-2-ol (**2**) can react with acetone (**1**) or 2,4-pentanedione (**12**) via nucleophilic additions, forming the 2-prop-1-en-2-yloxypropan-2-ol (**14**,  $C_6H_{12}O_2$ ) or 4-hydroxy-4-(prop-1-en-2-yloxy)pentan-2-one (**15**,  $C_8H_{14}O_3$ ) (Fig. S5). Since each of the above molecular formulae has multiple isomers, further work is needed to provide confidence in their identification and better analyze their formation pathways, which is beyond the scope of the present work.

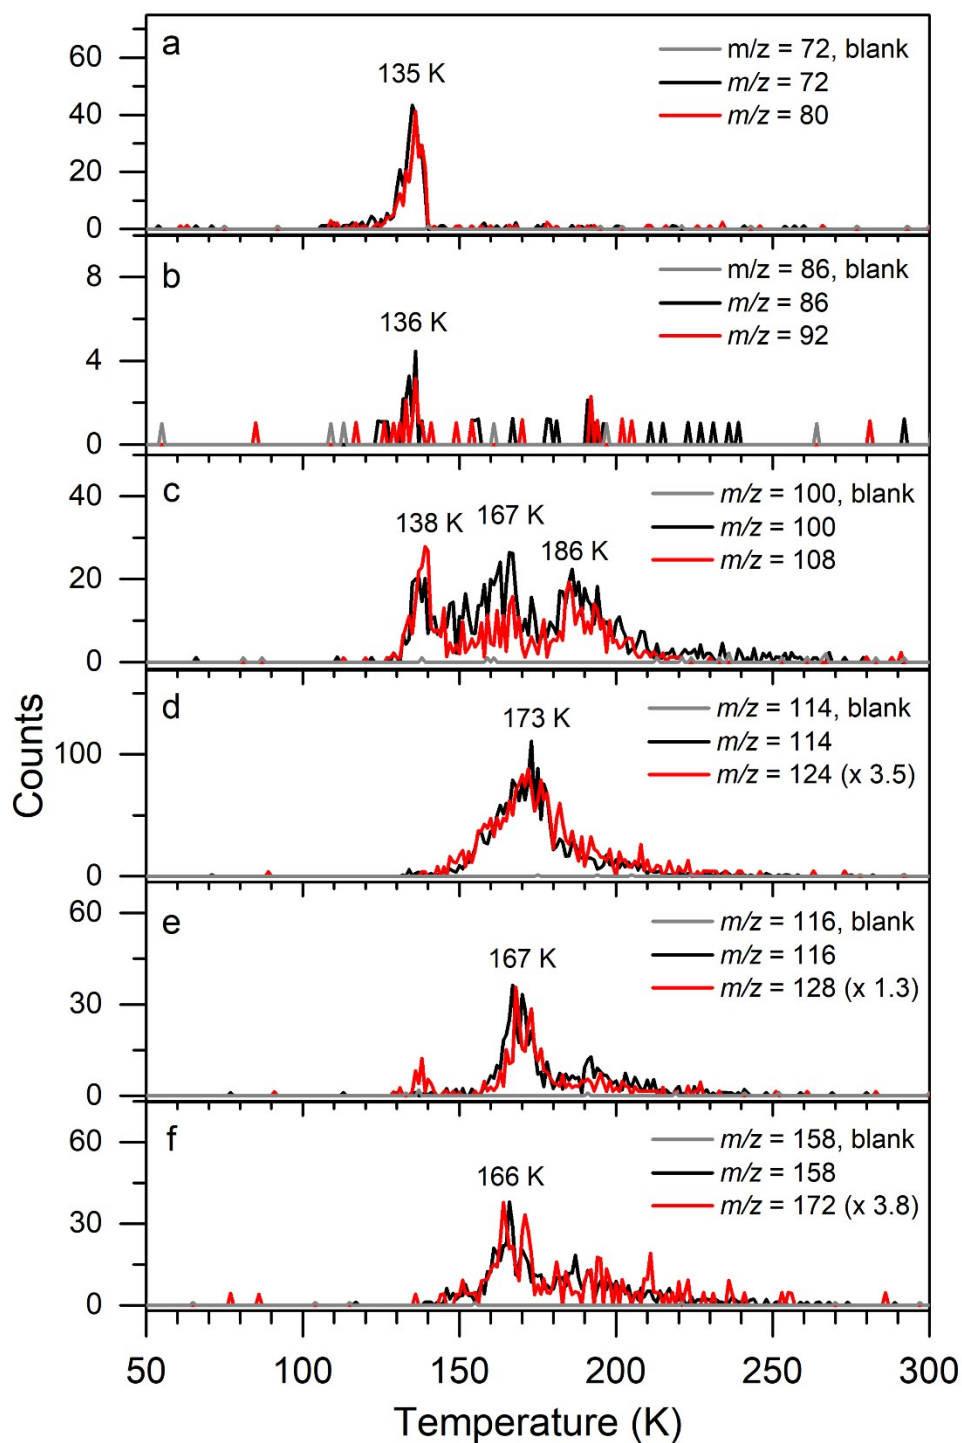

**Fig. S1** Temperature programmed desorption profiles of higher mass-to-charge ratios ( $m/z$ ) recorded at 9.43 eV in blank or unirradiated acetone (gray), irradiated acetone (black), and irradiated acetone- $d_6$  (red) ices.



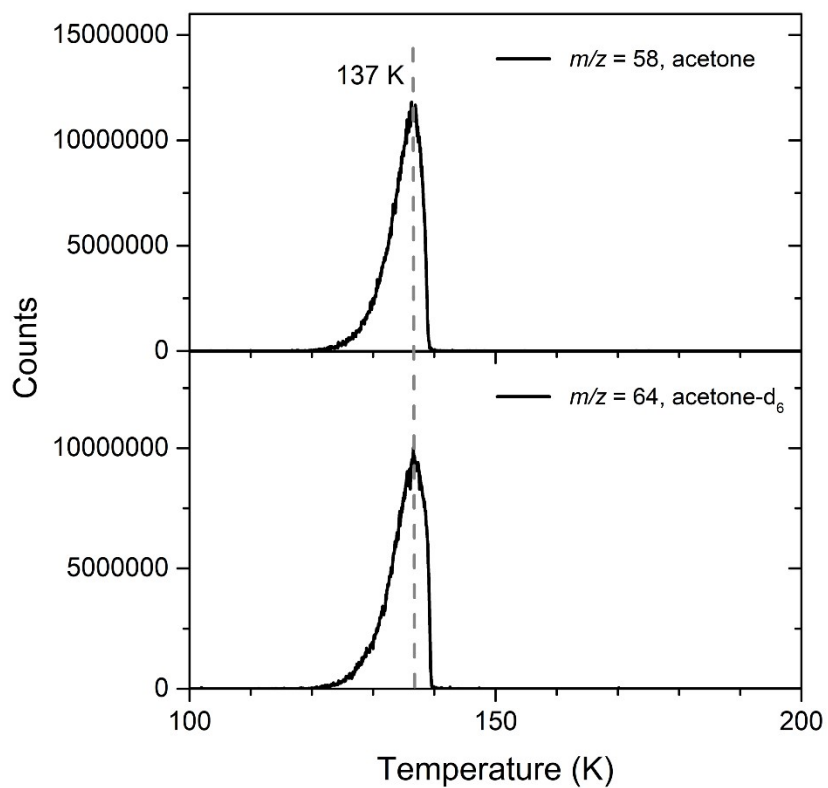

**Fig. S2** QMS TPD profiles of acetone (top) at  $m/z = 58$  and acetone-d<sub>6</sub> (bottom) at  $m/z = 64$ . The dashed line indicates their peak sublimation temperature at 137 K.

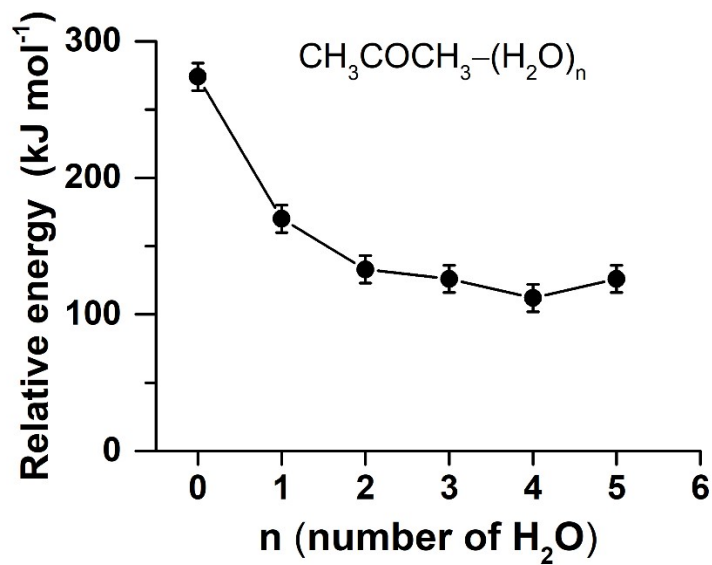

**Fig. S3** The reduction and leveling of the reaction barrier of systems  $\text{CH}_3\text{COCH}_3 + n(\text{H}_2\text{O})$  ( $n = 0 - 5$ ) leading to the formation of propen-2-ol (**2**), as more water molecules are involved in the reaction. The anticipated accuracy of the reaction barriers is within  $10 \text{ kJ mol}^{-1}$ .

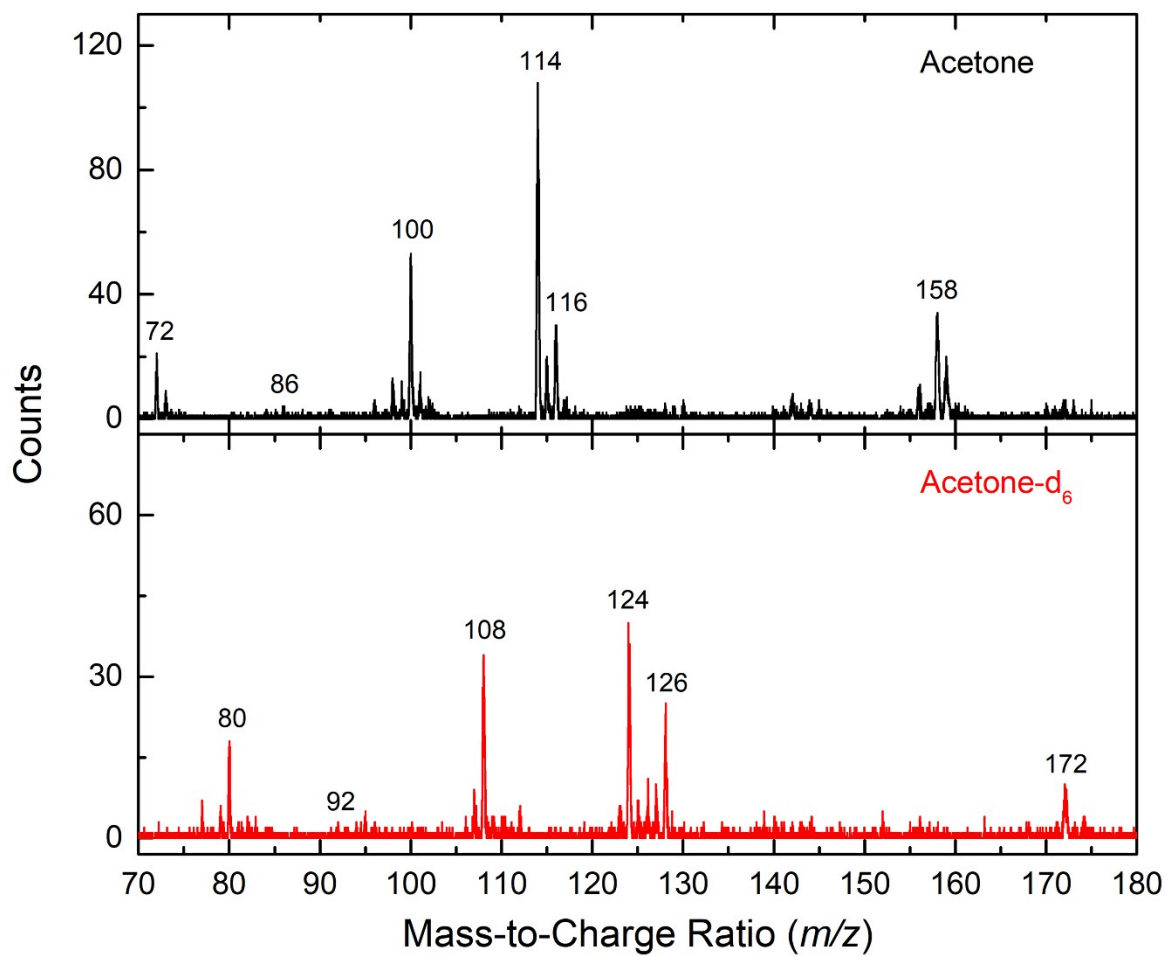

**Fig. S4** Mass spectra (integrated ion signals) of higher masses recorded at 9.43 eV in irradiated acetone (top) and acetone-d<sub>6</sub> (bottom) ices.

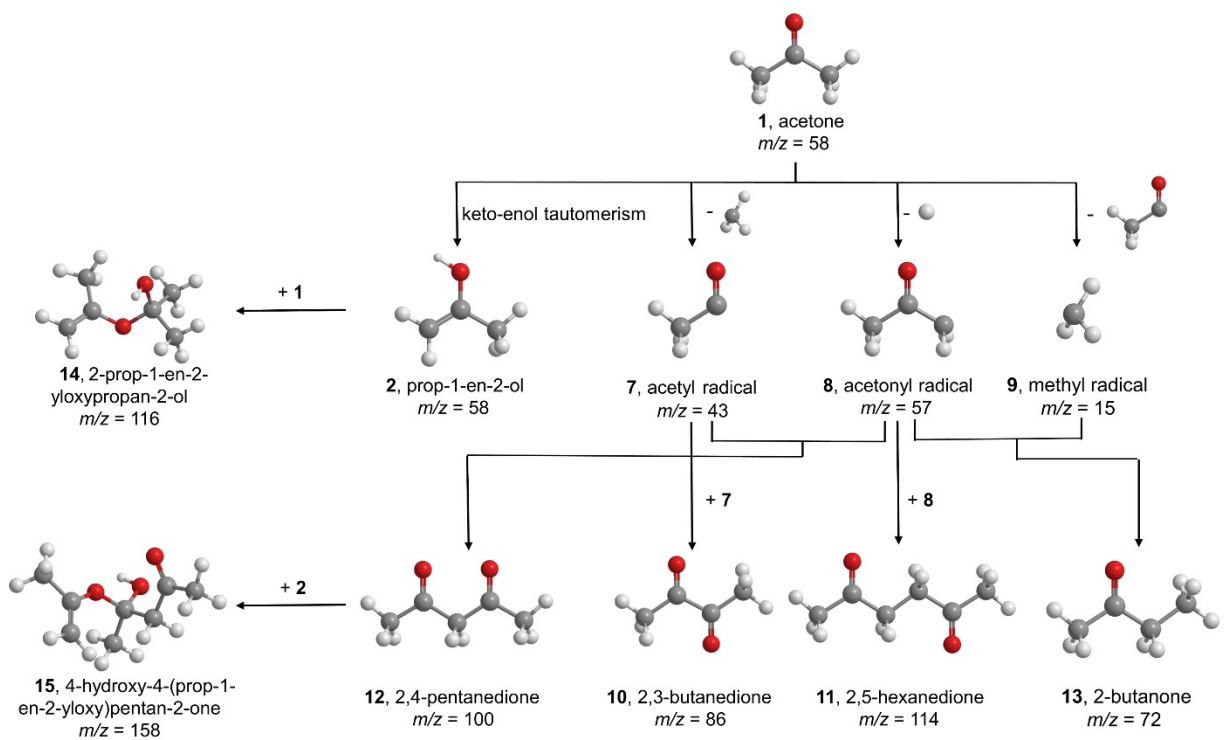

**Fig. S5** Proposed formation pathways for molecules **10 – 15** in irradiated acetone ice.



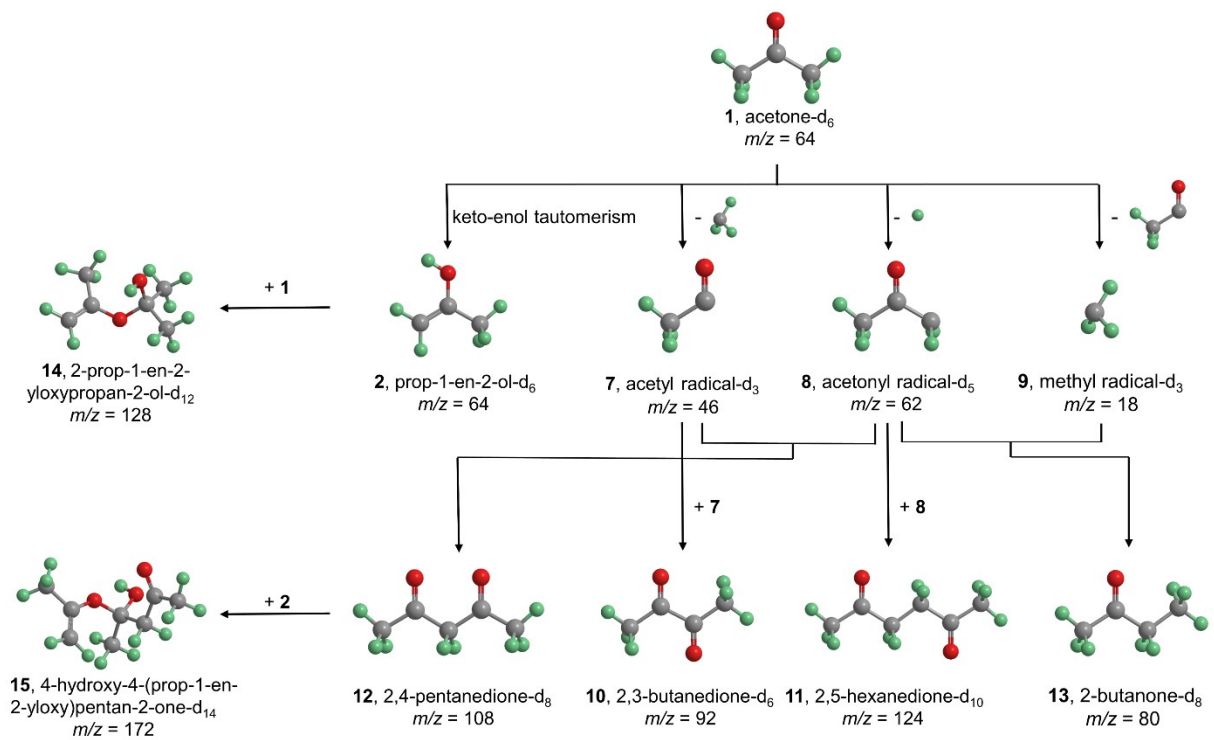

**Fig. S6** Proposed formation pathways for molecules **10** – **15** in irradiated acetone-d<sub>6</sub> ice.

**Table S1.** Conditions of ice studied in this work including the ice composition, thickness, irradiation parameters, and VUV photon energies.

| Ice composition                                                                            | Thickness (nm) | Current (nA) | Irradiation Time (s) | Dose (eV molecule <sup>-1</sup> )                                                                              | Photon energy (eV) |
|--------------------------------------------------------------------------------------------|----------------|--------------|----------------------|----------------------------------------------------------------------------------------------------------------|--------------------|
| CH <sub>3</sub> COCH <sub>3</sub>                                                          | 720 ± 50       | -            | -                    | -                                                                                                              | 9.43               |
| CH <sub>3</sub> COCH <sub>3</sub>                                                          | 710 ± 30       | 21 ± 1       | 300 ± 10             | 0.34 ± 0.05                                                                                                    | 9.43               |
| CD <sub>3</sub> COCD <sub>3</sub>                                                          | 710 ± 30       | 22 ± 2       | 300 ± 10             | 0.40 ± 0.06                                                                                                    | 9.43               |
| CH <sub>3</sub> COCH <sub>3</sub> –<br>CD <sub>3</sub> COCD <sub>3</sub><br>(1.1 ± 0.2): 1 | 720 ± 50       | 15 ± 1       | 120 ± 10             | 0.10 ± 0.02 for<br>CH <sub>3</sub> COCH <sub>3</sub> ,<br>0.11 ± 0.02 for<br>CD <sub>3</sub> COCD <sub>3</sub> | 9.43               |
| CH <sub>3</sub> COCH <sub>3</sub>                                                          | 710 ± 30       | 20 ± 2       | 300 ± 10             | 0.33 ± 0.05                                                                                                    | 8.90               |
| CH <sub>3</sub> COCH <sub>3</sub>                                                          | 710 ± 30       | 20 ± 2       | 300 ± 10             | 0.33 ± 0.05                                                                                                    | 8.40               |

**Table S2.** Parameters for the generation of vacuum ultraviolet (VUV) light. The uncertainty for VUV photon energies is less than 0.001 eV.

| VUV photon energy (eV) | Nonlinear medium in four-wave mixing ( $2\omega_1 - \omega_2$ ) | $\omega_1$ Dye laser wavelength (nm) | $\omega_1$ Dye        | $\omega_2$ Dye laser wavelength (nm) | $\omega_2$ Dye  |
|------------------------|-----------------------------------------------------------------|--------------------------------------|-----------------------|--------------------------------------|-----------------|
| 9.43                   | Krypton                                                         | 202.316                              | Rhodamine 610 and 640 | 438.654                              | Coumarin 440    |
| 8.90                   | Xenon                                                           | 222.566                              | Coumarin 450          | 553.180                              | Pyromethene 580 |
| 8.40                   | Krypton                                                         | 202.316                              | Rhodamine 610 and 640 | 321.497 <sup>a</sup>                 | Rhodamine 640   |

<sup>a</sup> obtained from the second harmonic generation.

**Table S3.** Error analysis of adiabatic ionization energies (IE) of C<sub>3</sub>H<sub>6</sub>O isomers **1** to **6**. The IEs were computed at the CCSD(T)/CBS//B3LYP/cc-pVTZ level of theory including the zero-point vibrational energy (ZPVE) corrections. The IE ranges were corrected for the thermal and Stark effect by  $-0.03$  eV and the combined error limits were determined to be  $-0.05/+0.03$  eV.<sup>2</sup> The computed Cartesian coordinates and vibrational frequencies are shown in Table S8.

| Name                   | Isomer    | Structure | Experimental IE (eV) <sup>3</sup> | Computed IE (eV) | IE range after error analysis (eV) | Corrected IE with electric field effect (eV) |
|------------------------|-----------|-----------|-----------------------------------|------------------|------------------------------------|----------------------------------------------|
| acetone                | <b>1</b>  |           | $9.703 \pm 0.006$                 | 9.70             | 9.697 – 9.709                      | 9.667 – 9.679                                |
|                        | <b>2a</b> |           | –                                 | 8.80             | 8.75 – 8.83                        | 8.72 – 8.80                                  |
| propen-2-ol            | <b>2b</b> |           | –                                 | 8.70             | 8.65 – 8.73                        | 8.62 – 8.70                                  |
|                        | <b>3</b>  |           | $10.22 \pm 0.02$                  | 10.20            | 10.20 – 10.24                      | 10.17 – 10.21                                |
| methyl vinyl ether     | <b>4</b>  |           | $8.95 \pm 0.01$                   | –                | 8.94 – 8.96                        | 8.91 – 8.93                                  |
| methoxy methyl carbene | <b>5a</b> |           | –                                 | 7.72             | 7.67 – 7.75                        | 7.64 – 7.72                                  |
|                        | <b>5b</b> |           | –                                 | 7.54             | 7.49 – 7.57                        | 7.46 – 7.54                                  |

|                     |                         |                                                                                   |   |                                 |               |               |
|---------------------|-------------------------|-----------------------------------------------------------------------------------|---|---------------------------------|---------------|---------------|
| 1-methyleneoxyethyl | <b>5t</b><br>(triplet)  | 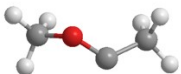 | – | 6.32                            | 6.27 – 6.35   | 6.24 – 6.32   |
|                     |                         |                                                                                   | – | 11.02 <sup>a</sup><br>(q-state) | 11.97 – 11.05 | 11.94 – 11.02 |
|                     | <b>6a</b>               |  | – | 7.05                            | 7.00 – 7.08   | 6.97 – 7.05   |
|                     | <b>6at</b><br>(triplet) |  | – | 6.53                            | 6.48 – 6.56   | 6.45 – 6.53   |
|                     |                         |                                                                                   | – | 10.79 <sup>a</sup><br>(q-state) | 10.74 – 10.82 | 10.71 – 10.79 |
|                     | <b>6b</b>               |  | – | 7.27                            | 7.22 – 7.30   | 7.19 – 7.27   |
|                     | <b>6bt</b><br>(triplet) |  | – | 6.53                            | 6.48 – 6.56   | 6.45 – 6.53   |
|                     |                         |                                                                                   | – | 10.76 <sup>a</sup><br>(q-state) | 10.71 – 10.79 | 10.68 – 10.76 |

<sup>a</sup> These isomers are not observable in these experiments because their IEs are much higher than the maximum photon energy (9.43 eV) used in the experiment.

**Table S4.** Absorption peaks observed in acetone ( $\text{CH}_3\text{COCH}_3$ ) ice before and after electron irradiation at 5 K.

| Pristine acetone ice, before irradiation ( $\text{cm}^{-1}$ ) | Assignment <sup>4</sup>                    | Approximate motion          |
|---------------------------------------------------------------|--------------------------------------------|-----------------------------|
| 3002                                                          | $\nu_1, \nu_{13}$                          | $\text{CH}_3$ asym. stretch |
| 2967                                                          | $\nu_9, \nu_{20}$                          | $\text{CH}_3$ asym. stretch |
| 2921                                                          | $\nu_2, \nu_{14}$                          | $\text{CH}_3$ sym. stretch  |
| 2854                                                          | $2\nu_{21}$                                | Overtone                    |
| 2781                                                          | $\nu_3+\nu_6$                              | Combination                 |
| 2581                                                          | $\nu_3+\nu_7$                              | Combination                 |
| 1708                                                          | $\nu_3$                                    | C=O stretch                 |
| 1443                                                          | $\nu_{21}$                                 | $\text{CH}_3$ asym. def     |
| 1419                                                          | $\nu_4$                                    | $\text{CH}_3$ asym. def     |
| 1365                                                          | $\nu_{16}$                                 | $\text{CH}_3$ sym. def      |
| 1351                                                          | $\nu_5$                                    | $\text{CH}_3$ sym. def      |
| 1229                                                          | $\nu_{17}$                                 | CCC asym. stretch           |
| 1096                                                          | $\nu_{22}$                                 | $\text{CH}_3$ rock          |
| 1071                                                          | $\nu_6$                                    | $\text{CH}_3$ rock          |
| 899                                                           | $\nu_{18}$                                 | $\text{CH}_3$ rock          |
| 793                                                           | $\nu_7$                                    | CCC sym. stretch            |
| New absorption after irradiation ( $\text{cm}^{-1}$ )         | Assignment <sup>4</sup>                    |                             |
| 2128                                                          | $\nu(\text{CO})/v_2(\text{H}_2\text{CCO})$ | CO stretch                  |

**Table S5.** Absorption peaks observed in acetone-d<sub>6</sub> (CD<sub>3</sub>COCD<sub>3</sub>) ice before and after electron irradiation at 5 K.

| Pristine acetone-d <sub>6</sub> ice, before irradiation (cm <sup>-1</sup> ) | Assignment <sup>5</sup> | Approximate motion                                                      |
|-----------------------------------------------------------------------------|-------------------------|-------------------------------------------------------------------------|
| 2341                                                                        | $\nu_4 + \nu_{15}$      | Combination                                                             |
| 2255                                                                        | $\nu_9, \nu_{20}$       | CD <sub>3</sub> asym. stretch                                           |
| 2222                                                                        | $\nu_1, \nu_{13}$       | CD <sub>3</sub> asym. stretch                                           |
| 2132                                                                        | $\nu_4 + \nu_5$         | Combination                                                             |
| 2112                                                                        | $\nu_2, \nu_{14}$       | CD <sub>3</sub> sym. stretch                                            |
| 1733                                                                        | $\nu_5 + \nu_7$         | Combination                                                             |
| 1697                                                                        | $\nu_3$                 | C=O stretch                                                             |
| 1662                                                                        | $\nu_5 + \nu_8$         | Combination                                                             |
| 1253                                                                        | $\nu_{15}$              | CD <sub>3</sub> asym. def                                               |
| 1092                                                                        | $\nu_4$                 | CD <sub>3</sub> asym. def                                               |
| 1031                                                                        | $\nu_{16}$              | CD <sub>3</sub> sym. def                                                |
| 965                                                                         | $2\nu_{19}$             | CD <sub>3</sub> rock                                                    |
| 893                                                                         | $\nu_6, \nu_{22}$       | CD <sub>3</sub> rock                                                    |
| New absorption after irradiation (cm <sup>-1</sup> )                        | Assignment <sup>6</sup> |                                                                         |
| 2096                                                                        | $\nu_5$ (tentative)     | CD <sub>3</sub> sym. stretch<br>(CD <sub>3</sub> C(OD)CD <sub>2</sub> ) |

**Table S6.** Integrated ion signals and relative signal strengths of the different isotopologues of propen-2-ol (**2**) in irradiated CH<sub>3</sub>COCH<sub>3</sub>-CD<sub>3</sub>COCD<sub>3</sub> ice.

| <i>m/z</i> | Molecular formula                              | Integrated signal | Relative signal |
|------------|------------------------------------------------|-------------------|-----------------|
| 58         | C <sub>3</sub> H <sub>6</sub> O                | 329 ± 13          | 0.50 ± 0.03     |
| 59         | C <sub>3</sub> H <sub>5</sub> DO               | 638 ± 29          | 1               |
| 60         | C <sub>3</sub> H <sub>4</sub> D <sub>2</sub> O | 33 ± 12           | 0.05 ± 0.02     |
| 61         | C <sub>3</sub> H <sub>3</sub> D <sub>3</sub> O | 10 ± 9            | 0.02 ± 0.01     |
| 62         | C <sub>3</sub> H <sub>2</sub> D <sub>4</sub> O | 7 ± 5             | 0.01 ± 0.01     |
| 63         | C <sub>3</sub> HD <sub>5</sub> O               | 142 ± 37          | 0.22 ± 0.06     |
| 64         | C <sub>3</sub> D <sub>6</sub> O                | 312 ± 13          | 0.48 ± 0.03     |



**Table S7.** Detected mass-to-charge ratios in the irradiated acetone and acetone-d<sub>6</sub> ice and tentative assignments of molecules.

| Mass-to-charge ratio |                        |                                               |                                                                                                                                    |                          |                                              |
|----------------------|------------------------|-----------------------------------------------|------------------------------------------------------------------------------------------------------------------------------------|--------------------------|----------------------------------------------|
| Acetone              | Acetone-d <sub>6</sub> | Formula                                       | Tentative assignment                                                                                                               | IE (eV)                  | Corrected IE with electric field effect (eV) |
| 72                   | 80                     | C <sub>3</sub> H <sub>8</sub> O               | 2-butanone<br>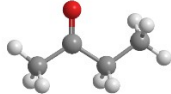                                    | 9.52 ± 0.04 <sup>3</sup> | 9.45 – 9.53                                  |
| 86                   | 92                     | C <sub>4</sub> H <sub>6</sub> O <sub>2</sub>  | 2,3-butanedione<br>                               | 9.23 – 9.30 <sup>1</sup> | 9.20 – 9.27                                  |
| 100                  | 108                    | C <sub>5</sub> H <sub>8</sub> O <sub>2</sub>  | 2,4-pentanedione<br>                             | 8.85 ± 0.02 <sup>3</sup> | 8.80 – 8.84                                  |
| 114                  | 124                    | C <sub>6</sub> H <sub>10</sub> O <sub>2</sub> | 2,5-hexanedione<br>                             | –                        | –                                            |
| 116                  | 128                    | C <sub>6</sub> H <sub>12</sub> O <sub>2</sub> | 2-prop-1-en-2-yloxypropan-2-ol<br>              | –                        | –                                            |
| 158                  | 172                    | C <sub>8</sub> H <sub>14</sub> O <sub>3</sub> | 4-hydroxy-4-(prop-1-en-2-yloxy)pentan-2-one<br> | –                        | –                                            |

**Table S8.** Cartesian coordinates for selected C<sub>3</sub>H<sub>6</sub>O structures. B3LYP/cc-pVTZ optimized geometry (distances in Å), electronic energies (in hartree), zero-point vibrational energies (ZPVE), extrapolated CCSD(T)/CBS energies (in hartree) and adiabatic ionization energies (IE) at CCSD(T)/CBS//B3LYP/cc-pVTZ level of theory.

---

**1, Acetone (C<sub>2v</sub>)**

|   |           |           |           |
|---|-----------|-----------|-----------|
| C | 0.000000  | 1.288092  | -0.620789 |
| C | -0.000000 | 0.000000  | 0.175466  |
| H | -0.876805 | 1.331963  | -1.270830 |
| H | 0.876805  | 1.331963  | -1.270830 |
| H | 0.000000  | 2.140897  | 0.052651  |
| C | -0.000000 | -1.288092 | -0.620789 |
| H | -0.876805 | -1.331963 | -1.270830 |
| H | -0.000000 | -2.140897 | 0.052651  |
| H | 0.876805  | -1.331963 | -1.270830 |
| O | -0.000000 | 0.000000  | 1.384697  |

E = -193.2331603

E[CCSD(T)/CBS] = -192.9201031

ZPVE = 52.2233 kcal mol<sup>-1</sup>

IE = 9.70 eV

| Frequency | Intensity |
|-----------|-----------|
| 43.3611   | 0.0000    |
| 136.6537  | 0.0021    |
| 379.3676  | 1.4689    |
| 490.0400  | 0.3827    |
| 535.5428  | 14.7988   |
| 781.9256  | 1.8237    |
| 885.4521  | 9.9750    |
| 885.4690  | 0.0000    |
| 1085.1343 | 0.0258    |
| 1120.3492 | 2.5912    |
| 1233.9829 | 74.8958   |
| 1387.1958 | 18.7148   |
| 1387.8563 | 56.8165   |
| 1460.7372 | 0.6096    |
| 1466.3440 | 0.0000    |
| 1470.9001 | 27.9261   |
| 1488.3742 | 18.6373   |
| 1793.7782 | 175.0413  |
| 3025.4480 | 1.2215    |
| 3032.5185 | 7.1208    |
| 3077.3937 | 0.0000    |

---

---

|           |         |
|-----------|---------|
| 3084.7486 | 19.7270 |
| 3138.5398 | 12.3851 |
| 3139.6114 | 7.4501  |

---

**I<sup>+</sup>, Acetone radical cation (C<sub>2</sub>)**

|   |           |           |           |
|---|-----------|-----------|-----------|
| C | -0.001471 | 1.326832  | -0.589947 |
| C | -0.000000 | -0.000000 | 0.152284  |
| H | -0.910702 | 1.338692  | -1.197145 |
| H | 0.872452  | 1.318096  | -1.245695 |
| H | 0.025010  | 2.163548  | 0.100767  |
| C | 0.001471  | -1.326832 | -0.589947 |
| H | -0.872452 | -1.318096 | -1.245695 |
| H | -0.025010 | -2.163548 | 0.100767  |
| H | 0.910702  | -1.338692 | -1.197145 |
| O | 0.000000  | 0.000000  | 1.356225  |

E = -192.8834063

E[CCSD(T)/CBS] = -192.5610784

ZPVE = 50.9363 kcal mol<sup>-1</sup>

| Frequency | Intensity |
|-----------|-----------|
| 47.8843   | 0.0023    |
| 141.5308  | 0.5411    |
| 334.7063  | 1.8206    |
| 363.4011  | 3.8903    |
| 476.8309  | 0.0008    |
| 692.1956  | 1.7829    |
| 897.1665  | 0.0092    |
| 900.9593  | 0.4029    |
| 1006.5598 | 0.3124    |
| 1064.8662 | 14.5513   |
| 1079.3092 | 1.2411    |
| 1301.7499 | 8.7149    |
| 1347.5160 | 0.2416    |
| 1422.0634 | 11.5468   |
| 1429.8093 | 22.1708   |
| 1438.8125 | 0.3620    |
| 1462.0548 | 36.5236   |
| 1619.3022 | 0.0004    |
| 3023.1233 | 47.9646   |
| 3030.4842 | 21.2369   |
| 3097.6561 | 0.0256    |
| 3104.4229 | 33.1251   |
| 3173.5431 | 0.3054    |

---

---

3174.5477      20.0913

---

**2a**, Acetone enol ( $C_s$ )

|   |           |           |           |
|---|-----------|-----------|-----------|
| C | 0.884998  | -1.113068 | 0.000000  |
| C | 0.009183  | 0.096873  | 0.000000  |
| H | 0.679520  | -1.727319 | -0.878845 |
| H | 0.679520  | -1.727319 | 0.878845  |
| H | 1.935803  | -0.834640 | 0.000000  |
| C | 0.436548  | 1.358491  | 0.000000  |
| H | -0.251272 | 2.194704  | 0.000000  |
| H | 1.491561  | 1.580920  | 0.000000  |
| O | -1.312053 | -0.260683 | 0.000000  |
| H | -1.855755 | 0.534703  | 0.000000  |

E = -193.2145068

E[CCSD(T)/CBS] = -192.9018861

ZPVE = 52.9908 kcal mol<sup>-1</sup>

IE = 8.80 eV

| Frequency | Intensity |
|-----------|-----------|
| 187.3283  | 1.1643    |
| 411.6287  | 1.5652    |
| 441.6040  | 100.7564  |
| 483.3059  | 17.7674   |
| 509.1547  | 0.2782    |
| 726.7750  | 0.8548    |
| 817.2377  | 70.0750   |
| 861.8940  | 4.9361    |
| 983.3085  | 17.6640   |
| 1023.2629 | 32.8677   |
| 1075.2204 | 0.4398    |
| 1204.1578 | 144.1494  |
| 1362.5961 | 13.7729   |
| 1415.9614 | 26.6198   |
| 1455.3824 | 3.9278    |
| 1474.4121 | 7.5757    |
| 1492.9396 | 7.9098    |
| 1717.3330 | 153.5019  |
| 3032.4016 | 18.5007   |
| 3079.2851 | 13.7439   |
| 3130.5369 | 14.5274   |
| 3143.4238 | 4.8778    |
| 3239.7196 | 8.8899    |
| 3798.7554 | 29.4014   |

---

**2a<sup>+</sup>**, Acetone enol radical cation ( $C_s$ )

---

---

|   |           |           |           |
|---|-----------|-----------|-----------|
| C | -0.116551 | -1.420121 | 0.000000  |
| C | 0.000000  | 0.047012  | 0.000000  |
| H | -1.154734 | -1.737476 | 0.000000  |
| H | 0.403462  | -1.826872 | 0.873819  |
| H | 0.403462  | -1.826872 | -0.873819 |
| C | 1.248164  | 0.721810  | 0.000000  |
| H | 1.305829  | 1.803517  | 0.000000  |
| H | 2.167529  | 0.153657  | 0.000000  |
| O | -1.112705 | 0.708045  | 0.000000  |
| H | -1.013584 | 1.677482  | 0.000000  |

E = -192.8980634

E[CCSD(T)/CBS] = -192.5766502

ZPVE = 52.2404 kcal mol<sup>-1</sup>

| Frequency | Intensity |
|-----------|-----------|
| 49.9316   | 2.1791    |
| 337.8396  | 0.0386    |
| 396.9033  | 0.8232    |
| 504.1019  | 10.0713   |
| 516.2239  | 13.5184   |
| 688.0623  | 101.4020  |
| 863.1349  | 6.5665    |
| 883.0662  | 52.6666   |
| 976.2592  | 4.0990    |
| 1031.4099 | 3.4012    |
| 1056.6947 | 3.8967    |
| 1177.8123 | 158.8569  |
| 1368.8930 | 92.0166   |
| 1433.7743 | 21.0690   |
| 1435.8196 | 17.5910   |
| 1460.3951 | 25.4498   |
| 1516.1887 | 73.0549   |
| 1540.7850 | 89.6238   |
| 3015.1288 | 50.1181   |
| 3057.4403 | 9.2174    |
| 3144.1412 | 21.5043   |
| 3161.6406 | 5.9289    |
| 3260.6477 | 10.8794   |
| 3666.3675 | 184.9125  |

---

**2b**, Acetone enol (C<sub>s</sub>)

|   |          |           |           |
|---|----------|-----------|-----------|
| C | 0.776425 | -1.166010 | 0.000000  |
| C | 0.013967 | 0.122323  | 0.000000  |
| H | 0.527893 | -1.763239 | -0.882473 |

---

---

|   |           |           |          |
|---|-----------|-----------|----------|
| H | 0.527893  | -1.763239 | 0.882473 |
| H | 1.849012  | -0.988840 | 0.000000 |
| C | 0.560752  | 1.334031  | 0.000000 |
| H | -0.054609 | 2.221439  | 0.000000 |
| H | 1.632750  | 1.448615  | 0.000000 |
| O | -1.353680 | -0.003049 | 0.000000 |
| H | -1.593024 | -0.933782 | 0.000000 |

E = -193.2115300

E[CCSD(T)/CBS] = -192.8992280

ZPVE = 52.7952 kcal mol<sup>-1</sup>

IE = 8.7 eV

| Frequency | Intensity |
|-----------|-----------|
| 202.8336  | 4.6008    |
| 249.9783  | 81.4330   |
| 413.3069  | 1.2100    |
| 472.7419  | 3.1359    |
| 503.2637  | 6.0558    |
| 740.5189  | 10.0632   |
| 847.6581  | 59.5270   |
| 853.3020  | 17.2559   |
| 979.5839  | 44.3935   |
| 1023.9128 | 2.2774    |
| 1074.0002 | 0.2970    |
| 1235.1715 | 35.8829   |
| 1327.2109 | 204.5558  |
| 1413.6977 | 7.4950    |
| 1440.9338 | 13.2862   |
| 1480.4724 | 7.2447    |
| 1491.1741 | 5.0486    |
| 1742.9148 | 93.7090   |
| 3008.2914 | 29.3854   |
| 3049.4967 | 19.9916   |
| 3125.5839 | 11.8057   |
| 3166.1677 | 0.2301    |
| 3255.5412 | 6.1575    |
| 3833.0242 | 55.4445   |

---

**2b<sup>+</sup>**, Acetone enol radical cation (C<sub>s</sub>)

|   |           |           |           |
|---|-----------|-----------|-----------|
| C | 0.170487  | -1.404240 | 0.000000  |
| C | 0.000000  | 0.062418  | 0.000000  |
| H | -0.777365 | -1.938630 | 0.000000  |
| H | 0.756572  | -1.703459 | 0.874699  |
| H | 0.756572  | -1.703459 | -0.874699 |
| C | 1.085928  | 0.969942  | 0.000000  |

---

---

|   |           |           |          |
|---|-----------|-----------|----------|
| H | 0.895576  | 2.034655  | 0.000000 |
| H | 2.101816  | 0.602501  | 0.000000 |
| O | -1.170342 | 0.619379  | 0.000000 |
| H | -1.908927 | -0.015364 | 0.000000 |

E = -192.9000084

E[CCSD(T)/CBS] = -192.5784944

ZPVE = 52.3623 kcal mol<sup>-1</sup>

| Frequency | Intensity |
|-----------|-----------|
| 41.3179   | 0.7449    |
| 380.9711  | 0.1493    |
| 395.7799  | 0.6806    |
| 499.7314  | 13.4746   |
| 524.0014  | 3.8402    |
| 674.2079  | 116.3003  |
| 856.0381  | 6.4449    |
| 901.9067  | 6.1938    |
| 985.4888  | 10.7773   |
| 1033.9370 | 29.1984   |
| 1058.8680 | 17.0411   |
| 1176.9209 | 102.3452  |
| 1377.3590 | 44.9495   |
| 1434.7348 | 16.2037   |
| 1438.1265 | 138.5743  |
| 1453.5257 | 14.9907   |
| 1505.9555 | 85.7278   |
| 1562.2445 | 56.3008   |
| 3017.9836 | 40.4807   |
| 3065.6771 | 10.7328   |
| 3131.9248 | 2.3822    |
| 3157.1443 | 26.7637   |
| 3276.1903 | 15.3731   |
| 3677.9094 | 235.2477  |

---

### 3, Propylene oxide (C<sub>1</sub>)

|   |           |           |           |
|---|-----------|-----------|-----------|
| O | 0.828151  | -0.788103 | -0.239678 |
| C | -0.151978 | -0.036276 | 0.485663  |
| C | 1.039391  | 0.616002  | -0.061056 |
| H | 0.949431  | 1.214820  | -0.962147 |
| H | 1.863181  | 0.881727  | 0.593531  |
| C | -1.507102 | 0.097896  | -0.148350 |
| H | -2.072435 | 0.904642  | 0.322842  |
| H | -2.078890 | -0.824440 | -0.033483 |
| H | -1.414651 | 0.312331  | -1.212823 |
| H | -0.153708 | -0.249991 | 1.551964  |

---

---

E = -193.1848099  
E[CCSD(T)/CBS] = -192.8734273  
ZPVE = 53.4227 kcal mol<sup>-1</sup>  
IE = 10.20 eV

| Frequency | Intensity |
|-----------|-----------|
| 206.8626  | 0.4530    |
| 366.6999  | 3.6260    |
| 410.5787  | 4.5829    |
| 771.9818  | 7.1502    |
| 845.3082  | 40.6571   |
| 908.1404  | 2.5280    |
| 974.1144  | 15.3056   |
| 1042.4171 | 8.6802    |
| 1130.4220 | 6.6258    |
| 1156.5150 | 1.0942    |
| 1165.4396 | 4.0121    |
| 1188.4077 | 0.6584    |
| 1294.6846 | 5.9149    |
| 1407.1784 | 3.4512    |
| 1440.1552 | 21.7397   |
| 1483.5629 | 5.0692    |
| 1497.8997 | 5.4985    |
| 1531.4050 | 5.0971    |
| 3027.9961 | 18.1314   |
| 3077.7230 | 29.2458   |
| 3085.1945 | 22.1969   |
| 3086.4761 | 9.1150    |
| 3109.3152 | 38.1208   |
| 3161.2533 | 31.8449   |

---

**3<sup>+</sup>**, Propylene oxide radical cation (C<sub>1</sub>)

|   |           |           |           |
|---|-----------|-----------|-----------|
| O | -0.812977 | 0.825585  | -0.170935 |
| C | 0.176116  | -0.080792 | 0.488006  |
| C | -1.063539 | -0.603419 | -0.101799 |
| H | -1.122401 | -1.034899 | -1.100128 |
| H | -1.912728 | -0.827742 | 0.546067  |
| C | 1.520712  | -0.074656 | -0.171100 |
| H | 2.053903  | -0.946042 | 0.224208  |
| H | 2.088834  | 0.814749  | 0.097370  |
| H | 1.443780  | -0.162172 | -1.252650 |
| H | 0.152698  | 0.104636  | 1.561969  |

E = -192.8151624  
E[CCSD(T)/CBS] = -192.4931845

---



---

ZPVE = 51.0130 kcal mol<sup>-1</sup>

| Frequency | Intensity |
|-----------|-----------|
| 171.0917  | 1.0275    |
| 265.0722  | 6.2472    |
| 337.4290  | 0.9421    |
| 399.6757  | 7.4099    |
| 637.9161  | 5.9540    |
| 741.1917  | 27.1708   |
| 909.9490  | 10.0678   |
| 928.8572  | 7.2026    |
| 1019.1844 | 26.9892   |
| 1100.6388 | 6.2430    |
| 1151.0243 | 22.8081   |
| 1172.3911 | 0.9912    |
| 1246.3029 | 8.3529    |
| 1344.6340 | 5.5320    |
| 1392.0829 | 28.4475   |
| 1425.9301 | 42.2753   |
| 1436.6627 | 9.7465    |
| 1483.7257 | 16.5636   |
| 3016.3457 | 35.4920   |
| 3037.1040 | 106.5865  |
| 3082.3838 | 11.5075   |
| 3103.1771 | 10.1779   |
| 3135.9039 | 35.4710   |
| 3145.4364 | 3.78350   |

---

**5a**, methoxy methyl carbene

|   |           |           |           |
|---|-----------|-----------|-----------|
| C | -1.834310 | 0.119978  | 0.000000  |
| C | -0.422597 | 0.613974  | 0.000000  |
| H | -2.336536 | 0.556213  | -0.868084 |
| H | -2.336536 | 0.556213  | 0.868084  |
| H | -1.951761 | -0.968260 | 0.000000  |
| O | 0.368176  | -0.422620 | 0.000000  |
| C | 1.787398  | -0.162473 | 0.000000  |
| H | 2.208044  | -0.626648 | -0.889807 |
| H | 2.208044  | -0.626648 | 0.889807  |
| H | 1.951377  | 0.912212  | 0.000000  |

E = -193.1294754

E[CCSD(T)/CBS] = -192.8259877

ZPVE = 51.6760 kcal mol<sup>-1</sup>

| Frequency | Intensity |
|-----------|-----------|
| 96.4397   | 3.7746    |
| 144.0836  | 4.5811    |

---

---

|           |          |
|-----------|----------|
| 247.9529  | 5.2190   |
| 329.9715  | 13.3721  |
| 557.3315  | 10.2882  |
| 879.9765  | 9.6493   |
| 907.9582  | 1.8274   |
| 1013.4830 | 6.7496   |
| 1119.3066 | 11.3806  |
| 1178.7087 | 1.2988   |
| 1181.2616 | 69.8272  |
| 1315.1482 | 167.9477 |
| 1361.6062 | 12.8495  |
| 1448.2786 | 11.1378  |
| 1451.6717 | 5.2039   |
| 1475.3827 | 9.4937   |
| 1490.9292 | 4.4204   |
| 1500.0949 | 14.5144  |
| 2989.8054 | 25.9075  |
| 3045.4078 | 41.6049  |
| 3067.4877 | 2.9670   |
| 3074.0230 | 30.3611  |
| 3127.6556 | 17.3186  |
| 3143.9347 | 6.4613   |

---

**5a<sup>+</sup>**, methoxy methyl carbene radical cation

|   |           |           |           |
|---|-----------|-----------|-----------|
| C | -1.345321 | -1.367745 | 0.000000  |
| C | -0.138649 | -0.562750 | 0.000000  |
| H | -1.318053 | -2.025454 | 0.875388  |
| H | -1.318053 | -2.025454 | -0.875388 |
| H | -2.242849 | -0.743855 | 0.000000  |
| O | 0.002157  | 0.649240  | 0.000000  |
| C | 1.344648  | 1.353676  | 0.000000  |
| H | 1.328187  | 1.957173  | 0.900051  |
| H | 1.328187  | 1.957173  | -0.900051 |
| H | 2.120983  | 0.597370  | 0.000000  |

E = -192.8538541

E[CCSD(T)/CBS] = -192.5424418

ZPVE = 51.7487 kcal mol<sup>-1</sup>

| Frequency | Intensity |
|-----------|-----------|
| 95.5055   | 1.7763    |
| 143.9092  | 0.2521    |
| 206.5568  | 6.3309    |
| 236.3693  | 10.4435   |
| 476.0835  | 8.4180    |
| 736.1612  | 70.5382   |
| 949.4676  | 15.3715   |

---

---

|           |          |
|-----------|----------|
| 957.8452  | 5.7378   |
| 1106.3270 | 5.0296   |
| 1155.1684 | 0.1243   |
| 1181.1532 | 5.8559   |
| 1356.8490 | 67.9303  |
| 1395.1234 | 21.9253  |
| 1413.4977 | 63.6228  |
| 1438.3015 | 6.5435   |
| 1462.9248 | 15.5603  |
| 1477.7192 | 27.2187  |
| 1731.7704 | 312.9276 |
| 3001.8939 | 50.7238  |
| 3067.4975 | 23.9788  |
| 3087.3813 | 0.9066   |
| 3096.3889 | 18.3536  |
| 3210.1442 | 4.9045   |
| 3214.7029 | 4.3192   |

---

**5b**, methoxy methyl carbene

|   |           |           |           |
|---|-----------|-----------|-----------|
| C | -1.967297 | -0.009938 | 0.086807  |
| C | -0.561144 | -0.495334 | 0.303981  |
| H | -2.671119 | -0.757881 | 0.442718  |
| H | -2.112051 | 0.079274  | -0.998785 |
| H | -2.207301 | 0.961828  | 0.531498  |
| O | 0.358521  | 0.419037  | 0.199574  |
| C | 0.114972  | 1.839428  | -0.097230 |
| H | -0.448434 | 1.945139  | -1.021268 |
| H | 1.102252  | 2.275793  | -0.204388 |
| H | -0.415857 | 2.310772  | 0.726712  |

E = -193.1164876

E[CCSD(T)/CBS] = -192.8133171

ZPVE = 51.3223 kcal mol<sup>-1</sup>

| Frequency | Intensity |
|-----------|-----------|
| 56.8599   | 0.8443    |
| 169.0002  | 0.4241    |
| 340.8810  | 0.7486    |
| 378.9863  | 0.8921    |
| 573.2025  | 0.5111    |
| 783.7655  | 3.8064    |
| 810.9238  | 5.3502    |
| 948.1938  | 2.9040    |
| 1049.9960 | 33.8844   |
| 1118.7530 | 1.2926    |
| 1162.8999 | 0.2201    |
| 1308.7404 | 78.1168   |

---

---

|           |         |
|-----------|---------|
| 1347.4503 | 45.1136 |
| 1435.7419 | 14.7232 |
| 1454.3453 | 0.2847  |
| 1481.0182 | 12.4335 |
| 1493.3063 | 3.9611  |
| 1500.1037 | 18.0625 |
| 2978.2132 | 5.8170  |
| 3033.9842 | 15.6102 |
| 3055.5562 | 14.4785 |
| 3120.2133 | 9.1297  |
| 3137.6556 | 15.8834 |
| 3160.6961 | 12.3819 |

---

**5b<sup>+</sup>**, methoxy methyl carbene radical cation

|   |           |           |           |
|---|-----------|-----------|-----------|
| C | 1.631653  | 0.514275  | 0.218985  |
| C | 0.637480  | -0.518952 | -0.003520 |
| H | 2.375675  | 0.442195  | -0.581605 |
| H | 2.162138  | 0.276400  | 1.147145  |
| H | 1.204950  | 1.519691  | 0.262539  |
| O | -0.560365 | -0.602081 | -0.163446 |
| C | -1.606348 | 0.519368  | -0.191571 |
| H | -1.098455 | 1.464413  | -0.040025 |
| H | -2.285399 | 0.256745  | 0.610827  |
| H | -2.060513 | 0.421606  | -1.170382 |

$E = -192.8480813$

$E[\text{CCSD(T)/CBS}] = -192.5364994$

$\text{ZPVE} = 51.5962 \text{ kcal mol}^{-1}$

| Frequency | Intensity |
|-----------|-----------|
| 49.9728   | 1.0627    |
| 87.5585   | 3.2724    |
| 229.0026  | 1.7788    |
| 363.3434  | 0.6138    |
| 518.5413  | 21.4952   |
| 633.4510  | 40.5322   |
| 905.2366  | 0.7924    |
| 974.0019  | 5.9095    |
| 1089.1775 | 11.8098   |
| 1126.5234 | 2.7437    |
| 1130.2990 | 0.9726    |
| 1357.9320 | 66.2982   |
| 1397.7987 | 18.0950   |
| 1399.2409 | 51.4471   |
| 1438.8174 | 13.8859   |
| 1451.9227 | 15.1939   |
| 1476.1662 | 25.8152   |

---

---

|           |          |
|-----------|----------|
| 1777.7934 | 252.7488 |
| 3002.1574 | 44.1903  |
| 3068.3113 | 27.3737  |
| 3088.6102 | 0.9446   |
| 3092.2211 | 19.2826  |
| 3215.2555 | 6.6177   |
| 3218.7121 | 1.9833   |

---

**5t**, methoxy methyl carbene, triplet

|   |           |           |           |
|---|-----------|-----------|-----------|
| C | 1.748119  | 0.462146  | 0.153742  |
| C | 0.562437  | -0.279832 | -0.340131 |
| H | 2.579779  | 0.338336  | -0.538175 |
| H | 2.067438  | 0.092314  | 1.137002  |
| H | 1.552263  | 1.539281  | 0.252384  |
| O | -0.600105 | -0.381062 | 0.297264  |
| C | -1.673696 | 0.476586  | -0.143586 |
| H | -1.382462 | 1.524951  | -0.060933 |
| H | -2.519120 | 0.272398  | 0.508413  |
| H | -1.933749 | 0.248314  | -1.176951 |

E = -193.0829400

E[CCSD(T)/CBS] = -192.7739003

ZPVE = 51.1986 kcal mol<sup>-1</sup>

| Frequency | Intensity |
|-----------|-----------|
| 87.1747   | 3.0628    |
| 137.4062  | 2.1173    |
| 147.6986  | 2.0881    |
| 406.6671  | 2.1171    |
| 428.4762  | 7.7781    |
| 846.6401  | 10.4910   |
| 970.5690  | 51.7888   |
| 1018.3177 | 1.6745    |
| 1079.7001 | 7.3052    |
| 1153.9042 | 1.7348    |
| 1185.8253 | 0.6120    |
| 1312.1986 | 139.1539  |
| 1382.2459 | 1.5666    |
| 1459.1392 | 4.4761    |
| 1462.3981 | 5.1591    |
| 1475.3775 | 0.4072    |
| 1487.8498 | 6.2098    |
| 1495.1653 | 10.6581   |
| 2943.5269 | 40.3305   |
| 2980.3417 | 32.0417   |
| 3024.7898 | 43.9049   |
| 3095.0809 | 31.1062   |

---

---

|           |         |  |  |
|-----------|---------|--|--|
| 3100.7100 | 9.8808  |  |  |
| 3132.7414 | 19.4783 |  |  |

---

**5t<sup>+</sup>**, methoxy methyl carbene radical cation, triplet

|   |           |           |           |
|---|-----------|-----------|-----------|
| C | 1.945377  | 0.183741  | 0.141902  |
| C | 0.551708  | 0.306333  | -0.242016 |
| H | 2.397015  | -0.611908 | -0.460243 |
| H | 2.048707  | -0.020281 | 1.210808  |
| H | 2.460999  | 1.108232  | -0.138672 |
| O | -0.463273 | 0.215825  | 0.429127  |
| C | -1.867438 | 0.369198  | -0.121224 |
| H | -2.285814 | 1.193983  | 0.443850  |
| H | -2.348404 | -0.573934 | 0.110688  |
| H | -1.791816 | 0.566850  | -1.184201 |

E = -192.8538544

E[CCSD(T)/CBS] = -192.5424418

ZPVE = 51.7478 kcal mol<sup>-1</sup>

| Frequency | Intensity |
|-----------|-----------|
| 94.9016   | 1.7488    |
| 143.6276  | 0.2799    |
| 206.4249  | 6.3210    |
| 236.4269  | 10.4320   |
| 476.1502  | 8.3877    |
| 736.4979  | 70.4535   |
| 949.1946  | 15.4197   |
| 957.8013  | 5.7183    |
| 1106.2516 | 5.1006    |
| 1155.2380 | 0.1252    |
| 1181.2397 | 5.8764    |
| 1356.6029 | 67.6154   |
| 1395.1081 | 21.9085   |
| 1413.4565 | 63.6970   |
| 1438.3149 | 6.5643    |
| 1462.9235 | 15.5514   |
| 1477.7484 | 27.2402   |
| 1731.5786 | 312.5163  |
| 3002.0938 | 50.5012   |
| 3068.3334 | 23.9973   |
| 3087.2200 | 0.9038    |
| 3096.4501 | 18.5285   |
| 3209.9194 | 4.9023    |
| 3214.5891 | 4.3213    |

---

**5t<sup>+</sup>**, methoxy methyl carbene radical cation, triplet q-state

|   |          |          |          |
|---|----------|----------|----------|
| C | 1.830365 | 0.248197 | 0.128868 |
|---|----------|----------|----------|

---

---

|   |           |           |           |
|---|-----------|-----------|-----------|
| C | 0.599571  | -0.193367 | -0.507161 |
| H | 2.568755  | 0.405117  | -0.669147 |
| H | 2.218509  | -0.500966 | 0.827349  |
| H | 1.725570  | 1.218161  | 0.638283  |
| O | -0.601211 | -0.384942 | 0.314981  |
| C | -1.714160 | 0.345680  | -0.004757 |
| H | -1.442769 | 1.374410  | -0.325309 |
| H | -2.455732 | 0.273814  | 0.782626  |
| H | -2.081835 | -0.048064 | -0.995715 |

E = -192.6845330

E[CCSD(T)/CBS] = -192.3634925

ZPVE = 47.8669 kcal mol<sup>-1</sup>

| Frequency | Intensity |
|-----------|-----------|
| 70.2827   | 4.1422    |
| 107.2506  | 5.1729    |
| 134.9396  | 14.3491   |
| 332.7074  | 2.9236    |
| 392.0071  | 2.9162    |
| 678.9430  | 7.7607    |
| 817.2803  | 8.8738    |
| 901.4497  | 241.8780  |
| 997.2504  | 5.5268    |
| 1022.4438 | 39.3760   |
| 1133.9441 | 5.3261    |
| 1161.1857 | 7.8787    |
| 1228.8157 | 127.4985  |
| 1272.8334 | 46.9087   |
| 1328.5364 | 108.5492  |
| 1366.4682 | 15.2269   |
| 1412.4624 | 9.6033    |
| 1459.2887 | 3.7782    |
| 2664.4944 | 260.8535  |
| 2839.5885 | 164.8977  |
| 2937.5075 | 72.2139   |
| 2996.8683 | 69.3914   |
| 3041.5609 | 31.6849   |
| 3185.2598 | 12.4669   |

---

**6a**, 1-methyleneoxyethyl

|   |           |           |           |
|---|-----------|-----------|-----------|
| C | 1.849170  | -0.035737 | 0.000000  |
| C | 0.452807  | -0.532823 | 0.000000  |
| H | 2.410972  | -0.373173 | 0.878625  |
| H | 1.852544  | 1.053931  | 0.000000  |
| H | 2.410972  | -0.373173 | -0.878625 |
| O | -0.508597 | 0.338288  | 0.000000  |

---

---

|   |           |           |          |
|---|-----------|-----------|----------|
| C | -1.811328 | 0.191523  | 0.000000 |
| H | -2.237102 | -0.799962 | 0.000000 |
| H | -2.369795 | 1.107463  | 0.000000 |
| H | 0.182808  | -1.581922 | 0.000000 |

E = -193.1132045

E[CCSD(T)/CBS] = -192.8057130

ZPVE = 50.7849 kcal mol<sup>-1</sup>

| Frequency | Intensity |
|-----------|-----------|
| 23.0379   | 0.5168    |
| 206.1886  | 0.0027    |
| 296.8997  | 2.7754    |
| 319.5769  | 112.0657  |
| 522.4038  | 6.4814    |
| 569.0577  | 7.8448    |
| 662.6667  | 16.1524   |
| 907.9233  | 31.4272   |
| 1037.5790 | 0.0740    |
| 1118.6766 | 4.6642    |
| 1172.6609 | 5.9020    |
| 1228.4298 | 71.3299   |
| 1375.5148 | 171.8412  |
| 1429.8952 | 23.3940   |
| 1453.1101 | 95.6229   |
| 1463.4629 | 6.2991    |
| 1489.1758 | 2.8655    |
| 1535.6161 | 44.6074   |
| 2980.4972 | 75.7292   |
| 3001.5530 | 30.1943   |
| 3099.6532 | 8.7135    |
| 3151.5320 | 14.0284   |
| 3159.2684 | 25.1375   |
| 3320.1775 | 5.3144    |

---

**6a<sup>+</sup>**, 1-methyleneoxyethyl radical cation

|   |           |           |           |
|---|-----------|-----------|-----------|
| C | 0.986042  | -1.510508 | 0.000000  |
| C | -0.137066 | -0.589174 | 0.000000  |
| H | 0.905587  | -2.175329 | 0.870065  |
| H | 1.944137  | -0.998350 | 0.000000  |
| H | 0.905587  | -2.175329 | -0.870065 |
| O | 0.087084  | 0.688251  | 0.000000  |
| C | -0.845742 | 1.637396  | 0.000000  |
| H | -1.890539 | 1.356992  | 0.000000  |
| H | -0.456670 | 2.641833  | 0.000000  |
| H | -1.176518 | -0.911184 | 0.000000  |

---



---

E = -192.8628855  
E[CCSD(T)/CBS] = -192.5471165  
ZPVE = 51.1827 kcal mol<sup>-1</sup>

| Frequency | Intensity |
|-----------|-----------|
| 135.4274  | 0.3663    |
| 215.3904  | 4.4072    |
| 307.0168  | 9.2775    |
| 433.0774  | 9.2929    |
| 535.5964  | 1.7544    |
| 731.7787  | 34.1669   |
| 811.3312  | 12.8492   |
| 886.5432  | 81.7371   |
| 1032.2226 | 0.8920    |
| 1059.1482 | 123.0415  |
| 1151.2434 | 7.5950    |
| 1206.2477 | 4.3215    |
| 1293.6695 | 40.0952   |
| 1382.0509 | 70.9304   |
| 1425.0538 | 11.9950   |
| 1426.2041 | 19.3296   |
| 1473.0470 | 12.9586   |
| 1535.5679 | 17.3439   |
| 2992.5648 | 69.1800   |
| 3024.1071 | 11.1185   |
| 3132.7030 | 54.5609   |
| 3141.5258 | 20.4948   |
| 3154.4341 | 9.0617    |
| 3316.8403 | 19.0392   |

---

**6at**, 1-methyleneoxyethyl, triplet

|   |           |           |           |
|---|-----------|-----------|-----------|
| C | 1.348162  | -1.197781 | -0.025289 |
| C | -0.023091 | -0.663420 | -0.156249 |
| H | 1.668687  | -1.263467 | 1.024364  |
| H | 2.068070  | -0.554868 | -0.537200 |
| H | 1.406326  | -2.197519 | -0.454275 |
| O | -0.168010 | 0.650101  | 0.255816  |
| C | -1.398018 | 1.203719  | 0.021447  |
| H | -1.957378 | 0.841180  | -0.831931 |
| H | -1.488012 | 2.217129  | 0.378893  |
| H | -0.904745 | -1.285038 | -0.033110 |

E = -193.0948875  
E[CCSD(T)/CBS] = -192.7848177  
ZPVE = 49.8580 kcal mol<sup>-1</sup>

---

| Frequency | Intensity |
|-----------|-----------|
|-----------|-----------|

---

---

|           |          |
|-----------|----------|
| 89.0645   | 4.4431   |
| 173.5962  | 0.5584   |
| 222.3677  | 6.9915   |
| 295.1746  | 0.9084   |
| 481.7065  | 1.7534   |
| 591.7096  | 21.3715  |
| 614.7865  | 36.4555  |
| 889.7726  | 8.0580   |
| 1020.0611 | 3.2008   |
| 1113.5290 | 10.3183  |
| 1125.7160 | 5.4083   |
| 1204.7918 | 64.2019  |
| 1258.3356 | 237.3613 |
| 1366.8562 | 40.8209  |
| 1418.0871 | 34.8732  |
| 1461.4508 | 9.3651   |
| 1467.0128 | 0.4222   |
| 1486.3325 | 2.8857   |
| 2953.1110 | 34.8164  |
| 3042.0943 | 15.3439  |
| 3101.1092 | 4.1561   |
| 3111.3365 | 34.0937  |
| 3125.1575 | 37.4654  |
| 3263.0300 | 9.5003   |

---

**6at<sup>+</sup>**, 1-methyleneoxyethyl radical cation, triplet

|   |           |           |           |
|---|-----------|-----------|-----------|
| C | 1.795666  | -0.167959 | 0.015016  |
| C | 0.460843  | 0.387478  | -0.127268 |
| H | 2.288311  | -0.175046 | -0.966119 |
| H | 1.786975  | -1.166332 | 0.443360  |
| H | 2.402886  | 0.508862  | 0.630264  |
| O | -0.564044 | -0.313641 | 0.246703  |
| C | -1.835103 | 0.073515  | 0.171895  |
| H | -2.071487 | 1.049807  | -0.229641 |
| H | -2.542411 | -0.653586 | 0.534302  |
| H | 0.263674  | 1.376195  | -0.536867 |

E = -192.8628850

E[CCSD(T)/CBS] = -192.5471210

ZPVE = 51.1804 kcal mol<sup>-1</sup>

| Frequency | Intensity |
|-----------|-----------|
| 134.3215  | 0.3604    |
| 215.2514  | 4.4114    |
| 306.8848  | 9.2799    |
| 433.1487  | 9.2761    |
| 535.4907  | 1.7536    |

---

---

|           |          |
|-----------|----------|
| 731.7443  | 34.1972  |
| 811.3209  | 12.8303  |
| 886.4524  | 81.5571  |
| 1032.3252 | 0.8875   |
| 1059.1238 | 123.0695 |
| 1151.2328 | 7.5629   |
| 1206.1469 | 4.3320   |
| 1293.8439 | 40.0900  |
| 1381.9560 | 70.7666  |
| 1424.9917 | 11.9919  |
| 1426.2279 | 19.3214  |
| 1472.9701 | 12.9515  |
| 1535.5729 | 17.2960  |
| 2992.8886 | 69.1229  |
| 3024.7181 | 11.1333  |
| 3132.3987 | 53.9471  |
| 3141.3007 | 21.0942  |
| 3154.1824 | 9.0451   |
| 3316.7098 | 19.0546  |

---

**6at<sup>+</sup>**, 1-methyleneoxyethyl radical cation, triplet, q-state

|   |           |           |           |
|---|-----------|-----------|-----------|
| C | 1.655344  | -0.241697 | 0.056224  |
| C | 0.488344  | 0.730186  | -0.032778 |
| H | 1.984342  | -0.541490 | -0.942748 |
| H | 1.356033  | -1.119184 | 0.629306  |
| H | 2.453184  | 0.299133  | 0.563071  |
| O | -0.639845 | 0.232933  | -0.639218 |
| C | -1.796790 | -0.045843 | 0.041246  |
| H | -2.419444 | 0.819198  | 0.273452  |
| H | -1.785316 | -0.962323 | 0.632305  |
| H | 0.689460  | 1.748378  | -0.399214 |

E = -192.7087577

E[CCSD(T)/CBS] = -192.3844963

ZPVE = 47.5123 kcal mol<sup>-1</sup>

| Frequency | Intensity |
|-----------|-----------|
| 144.8821  | 3.4012    |
| 164.0218  | 2.2568    |
| 286.6558  | 6.9277    |
| 363.4720  | 45.6959   |
| 469.8462  | 6.5272    |
| 491.4564  | 10.4745   |
| 636.2938  | 144.3598  |
| 794.7816  | 91.8971   |
| 857.4964  | 13.9691   |

---

---

|           |          |
|-----------|----------|
| 950.0922  | 5.8398   |
| 976.3812  | 0.8635   |
| 989.2137  | 4.9183   |
| 1034.1449 | 4.5591   |
| 1172.0870 | 24.7049  |
| 1310.4139 | 39.9024  |
| 1358.0011 | 14.1113  |
| 1425.5162 | 32.1606  |
| 1443.9948 | 14.6361  |
| 2952.8459 | 205.7888 |
| 3011.7653 | 172.4843 |
| 3016.3455 | 20.8433  |
| 3099.2695 | 7.5398   |
| 3132.3481 | 11.0413  |
| 3153.9932 | 63.8612  |

---

**6b**, 1-methyleneoxyethyl

|   |           |           |           |
|---|-----------|-----------|-----------|
| C | 1.429739  | -0.644198 | 0.000000  |
| C | 0.659138  | 0.606942  | 0.000000  |
| H | 2.498036  | -0.440438 | 0.000000  |
| H | 1.192188  | -1.266160 | -0.877668 |
| H | 1.192188  | -1.266160 | 0.877668  |
| O | -0.641995 | 0.574564  | 0.000000  |
| C | -1.437441 | -0.470696 | 0.000000  |
| H | -1.031561 | -1.467043 | 0.000000  |
| H | -2.484274 | -0.233590 | 0.000000  |
| H | 1.065801  | 1.602739  | 0.000000  |

E = -193.1194698

E[CCSD(T)/CBS] = -192.8136406

ZPVE = 51.3465 kcal mol<sup>-1</sup>

| Frequency | Intensity |
|-----------|-----------|
| 230.2630  | 4.4944    |
| 279.2240  | 0.1121    |
| 301.5178  | 24.1596   |
| 398.6635  | 55.4454   |
| 548.3303  | 52.3548   |
| 592.1802  | 4.1683    |
| 645.6668  | 2.1549    |
| 937.8283  | 8.4751    |
| 1027.1509 | 0.1573    |
| 1120.9249 | 44.2542   |
| 1156.8990 | 7.4211    |
| 1213.0137 | 33.1919   |
| 1390.2059 | 38.1856   |
| 1429.6286 | 135.3225  |

---

---

|           |         |
|-----------|---------|
| 1449.2262 | 38.5075 |
| 1454.0217 | 9.7268  |
| 1480.7322 | 12.2494 |
| 1514.1884 | 4.7781  |
| 2930.2562 | 38.9185 |
| 2942.2856 | 42.7964 |
| 3118.6876 | 9.6412  |
| 3181.2097 | 7.7450  |
| 3246.7160 | 4.8384  |
| 3328.5677 | 5.1193  |

---

**6b<sup>+</sup>**, 1-methyleneoxyethyl radical cation

|   |           |           |           |
|---|-----------|-----------|-----------|
| C | -1.441133 | 0.534417  | 0.000000  |
| C | -0.021174 | 0.868893  | 0.000000  |
| H | -2.040008 | 1.440573  | 0.000000  |
| H | -1.702257 | -0.066963 | 0.880685  |
| H | -1.702257 | -0.066963 | -0.880685 |
| O | 0.939901  | -0.016308 | 0.000000  |
| C | 0.800786  | -1.330033 | 0.000000  |
| H | -0.180900 | -1.779945 | 0.000000  |
| H | 1.733253  | -1.871240 | 0.000000  |
| H | 0.375108  | 1.876108  | 0.000000  |

E = -192.8609005

E[CCSD(T)/CBS] = -192.5464685

ZPVE = 51.4455 kcal mol<sup>-1</sup>

| Frequency | Intensity |
|-----------|-----------|
| 121.0535  | 1.8860    |
| 273.7486  | 4.6257    |
| 293.8845  | 2.4211    |
| 504.9968  | 12.3757   |
| 585.8411  | 6.1165    |
| 703.1492  | 15.2404   |
| 786.9320  | 35.1146   |
| 931.8280  | 13.5264   |
| 1040.6974 | 0.0051    |
| 1057.3183 | 117.8034  |
| 1117.1836 | 7.0607    |
| 1195.0183 | 3.1213    |
| 1275.9854 | 35.2110   |
| 1369.7773 | 19.0440   |
| 1446.8448 | 19.7408   |
| 1453.4462 | 13.8444   |
| 1472.1198 | 43.6517   |
| 1519.8502 | 9.6546    |
| 2987.1359 | 25.6550   |

---

---

|           |         |
|-----------|---------|
| 3026.4026 | 3.8506  |
| 3149.9394 | 7.9123  |
| 3151.5561 | 54.8239 |
| 3205.7604 | 29.6204 |
| 3316.1890 | 14.6591 |

---

|                                           |           |           |           |
|-------------------------------------------|-----------|-----------|-----------|
| <b>6bt</b> , 1-methyleneoxyethyl, triplet |           |           |           |
| C                                         | -1.712029 | 0.824489  | 0.327697  |
| C                                         | -0.427147 | 0.332181  | -0.209490 |
| H                                         | -2.132179 | 1.582897  | -0.331823 |
| H                                         | -1.597240 | 1.271541  | 1.325845  |
| H                                         | -2.433312 | 0.009885  | 0.426540  |
| O                                         | 0.150043  | -0.692382 | 0.522823  |
| C                                         | 1.229807  | -1.273945 | -0.086384 |
| H                                         | 1.650324  | -2.098976 | 0.464947  |
| H                                         | 1.817632  | -0.670900 | -0.765656 |
| H                                         | 0.272569  | 0.978957  | -0.730592 |

E = -193.0941805

E[CCSD(T)/CBS] = -192.7846289

ZPVE = 49.7378 kcal mol<sup>-1</sup>

| Frequency | Intensity |
|-----------|-----------|
| 93.2074   | 3.4117    |
| 170.4327  | 0.5613    |
| 206.0163  | 3.3482    |
| 298.2683  | 3.0813    |
| 480.2045  | 0.2452    |
| 525.0949  | 31.9584   |
| 578.8678  | 36.2038   |
| 894.5851  | 9.1964    |
| 1016.9600 | 3.8095    |
| 1112.9386 | 7.1655    |
| 1128.7505 | 5.4925    |
| 1208.7387 | 63.6849   |
| 1261.4890 | 240.5474  |
| 1368.7635 | 40.4161   |
| 1419.2883 | 38.3129   |
| 1461.7983 | 7.5836    |
| 1472.2464 | 1.8357    |
| 1486.8298 | 3.3653    |
| 2950.9580 | 34.8010   |
| 3041.8042 | 15.5088   |
| 3101.2670 | 4.2814    |
| 3119.2037 | 24.2336   |
| 3123.1627 | 40.5538   |
| 3271.2485 | 10.3874   |

---

---

**6bt<sup>+</sup>**, 1-methyleneoxyethyl radical cation, triplet

|   |           |           |           |
|---|-----------|-----------|-----------|
| C | -1.792090 | -0.155763 | -0.017984 |
| C | -0.462371 | 0.401340  | 0.160652  |
| H | -2.385249 | 0.523491  | -0.644161 |
| H | -2.308996 | -0.169283 | 0.950563  |
| H | -1.770813 | -1.151726 | -0.451426 |
| O | 0.572937  | -0.295949 | -0.191072 |
| C | 1.840954  | 0.093056  | -0.082249 |
| H | 2.558527  | -0.630777 | -0.430747 |
| H | 2.065305  | 1.067598  | 0.330290  |
| H | -0.277499 | 1.388229  | 0.580271  |

E = -192.8628850

E[CCSD(T)/CBS] = -192.5471204

ZPVE = 51.1808 kcal mol<sup>-1</sup>

| Frequency | Intensity |
|-----------|-----------|
| 134.5331  | 0.3617    |
| 215.2243  | 4.4110    |
| 306.8729  | 9.2794    |
| 433.1392  | 9.2753    |
| 535.4984  | 1.7543    |
| 731.7369  | 34.1983   |
| 811.3300  | 12.8339   |
| 886.4867  | 81.5601   |
| 1032.2995 | 0.8894    |
| 1059.2040 | 123.0845  |
| 1151.2528 | 7.5691    |
| 1206.1949 | 4.3354    |
| 1293.8731 | 40.0825   |
| 1381.9692 | 70.8260   |
| 1425.0049 | 11.9942   |
| 1426.1870 | 19.3227   |
| 1472.9845 | 12.9505   |
| 1535.6029 | 17.2930   |
| 2992.7875 | 69.1332   |
| 3024.5317 | 11.1320   |
| 3132.4055 | 54.0330   |
| 3141.3171 | 20.9868   |
| 3154.3051 | 9.0527    |
| 3316.7234 | 19.0544   |

---

**6bt<sup>+</sup>**, 1-methyleneoxyethyl radical cation, triplet, q-state

|   |           |           |           |
|---|-----------|-----------|-----------|
| C | -1.683433 | -0.221780 | -0.066425 |
| C | -0.537255 | 0.768439  | 0.058490  |
| H | -2.515086 | 0.339181  | -0.490030 |
| H | -1.962307 | -0.616952 | 0.914511  |

---

---

|   |           |           |           |
|---|-----------|-----------|-----------|
| H | -1.389898 | -1.036797 | -0.727878 |
| O | 0.626258  | 0.254657  | 0.578141  |
| C | 1.738999  | 0.064491  | -0.203512 |
| H | 1.951717  | -0.990466 | -0.399330 |
| H | 2.552303  | 0.754064  | 0.040910  |
| H | -0.740595 | 1.755381  | 0.499260  |

E = -192.7104871

E[CCSD(T)/CBS] = -192.3862877

ZPVE = 47.8024 kcal mol<sup>-1</sup>

| Frequency | Intensity |
|-----------|-----------|
| 143.9840  | 2.5162    |
| 163.7291  | 2.3738    |
| 300.1649  | 5.7358    |
| 434.6810  | 16.4097   |
| 449.0680  | 24.5153   |
| 595.9410  | 177.6518  |
| 692.4751  | 59.2398   |
| 787.9562  | 103.4722  |
| 861.4352  | 4.9904    |
| 943.7548  | 1.5430    |
| 971.4944  | 1.2630    |
| 1004.6999 | 4.6518    |
| 1051.4545 | 6.8810    |
| 1179.3041 | 15.9405   |
| 1315.6496 | 43.9413   |
| 1360.3642 | 19.6637   |
| 1427.1415 | 32.1179   |
| 1444.7458 | 12.4923   |
| 2958.2485 | 301.8091  |
| 2993.1606 | 141.3534  |
| 3016.1739 | 9.9116    |
| 3099.2120 | 6.4473    |
| 3110.1069 | 65.1820   |
| 3133.3235 | 9.8122    |

---



**Table S9.** The  $\omega$ B97X-D/6-311G(d,p) optimized geometries and harmonic frequencies of the reactants, transition states, and products depicted in Fig. 5.

|                                                           |           |           |           |
|-----------------------------------------------------------|-----------|-----------|-----------|
| <b>R0, Acetone, CH<sub>3</sub>C(O)CH<sub>3</sub></b>      |           |           |           |
| C                                                         | 0.000000  | 1.285376  | 0.612598  |
| C                                                         | 0.000000  | 0.000000  | -0.187852 |
| O                                                         | 0.000000  | 0.000000  | -1.392832 |
| C                                                         | 0.000000  | -1.285376 | 0.612598  |
| H                                                         | 0.943971  | 1.377015  | 1.159027  |
| H                                                         | -0.802116 | 1.278292  | 1.356041  |
| H                                                         | -0.116116 | 2.137148  | -0.055773 |
| H                                                         | 0.116116  | -2.137148 | -0.055773 |
| H                                                         | -0.943971 | -1.377015 | 1.159027  |
| H                                                         | 0.802116  | -1.278292 | 1.356041  |
| Frequencies                                               |           |           |           |
| 53.4499                                                   | 133.5866  | 383.5578  |           |
| 492.7647                                                  | 541.1902  | 795.5710  |           |
| 884.8346                                                  | 894.6565  | 1086.0112 |           |
| 1122.8809                                                 | 1244.2777 | 1387.7351 |           |
| 1397.4726                                                 | 1463.9048 | 1468.6523 |           |
| 1473.9393                                                 | 1491.5856 | 1852.1136 |           |
| 3043.4252                                                 | 3048.6544 | 3112.8430 |           |
| 3118.9099                                                 | 3165.8703 | 3167.3884 |           |
| <b>P0, propen-2-ol, CH<sub>3</sub>C(OH)CH<sub>2</sub></b> |           |           |           |
| C                                                         | -0.980498 | -1.033274 | 0.000000  |
| C                                                         | -0.085172 | -0.046750 | 0.000000  |
| O                                                         | -0.406360 | 1.275492  | 0.000000  |
| C                                                         | 1.397703  | -0.231494 | 0.000000  |
| H                                                         | -2.048070 | -0.838031 | 0.000000  |
| H                                                         | -0.659492 | -2.065263 | 0.000000  |
| H                                                         | -1.361527 | 1.363465  | 0.000001  |
| H                                                         | 1.832950  | 0.246697  | -0.881555 |
| H                                                         | 1.661868  | -1.288384 | -0.000004 |
| H                                                         | 1.832948  | 0.246689  | 0.881560  |
| Frequencies                                               |           |           |           |
| 181.8918                                                  | 419.4738  | 443.1288  |           |
| 494.3902                                                  | 512.8506  | 734.1046  |           |
| 823.6144                                                  | 877.8479  | 991.3134  |           |
| 1032.9915                                                 | 1078.5027 | 1228.4877 |           |
| 1381.6810                                                 | 1425.3841 | 1464.6694 |           |
| 1476.6993                                                 | 1497.6885 | 1750.3240 |           |
| 3052.1622                                                 | 3117.6329 | 3158.2009 |           |
| 3159.0225                                                 | 3259.8322 | 3902.2729 |           |
| <b>TS0</b>                                                |           |           |           |
| C                                                         | 1.462468  | 0.264308  | -0.018764 |

---

---

|   |           |           |           |
|---|-----------|-----------|-----------|
| C | 0.002851  | -0.024197 | -0.007499 |
| O | -0.430997 | -1.226760 | 0.012078  |
| C | -1.106807 | 0.861681  | 0.044471  |
| H | 1.681870  | 1.004276  | 0.755286  |
| H | 1.737588  | 0.714953  | -0.975914 |
| H | 2.047885  | -0.637303 | 0.154511  |
| H | -1.460330 | -0.560291 | 0.289328  |
| H | -1.699207 | 0.813470  | -0.871004 |
| H | -1.010895 | 1.868228  | 0.441923  |

Frequencies

|            |           |           |
|------------|-----------|-----------|
| -2183.3396 | 111.1829  | 372.6432  |
| 423.8953   | 565.8434  | 671.0433  |
| 773.4529   | 906.3437  | 990.2182  |
| 1027.8534  | 1111.6509 | 1190.2282 |
| 1344.1638  | 1408.1479 | 1459.7540 |
| 1476.4764  | 1501.9741 | 1576.2689 |
| 1975.9951  | 3064.1761 | 3109.0196 |
| 3133.9494  | 3174.7429 | 3195.0570 |

---

**R1**, CH<sub>3</sub>C(O)CH<sub>3</sub>·H<sub>2</sub>O

|   |           |           |           |
|---|-----------|-----------|-----------|
| C | -0.233169 | 1.335134  | -0.033484 |
| C | -0.723346 | -0.092043 | -0.024373 |
| O | 0.033734  | -1.035326 | -0.099271 |
| C | -2.214958 | -0.300450 | 0.078235  |
| H | -0.709838 | 1.910779  | 0.764527  |
| H | -0.523495 | 1.800900  | -0.980954 |
| H | 0.852145  | 1.360855  | 0.061755  |
| H | -2.457239 | -1.351287 | -0.071462 |
| H | -2.740871 | 0.318618  | -0.653544 |
| H | -2.556025 | 0.015010  | 1.069345  |
| O | 2.749788  | -0.075538 | -0.029128 |
| H | 2.964601  | -0.253201 | 0.886700  |
| H | 1.931389  | -0.570613 | -0.171449 |

Frequencies

|           |           |           |
|-----------|-----------|-----------|
| 44.8599   | 96.9296   | 127.4351  |
| 134.5612  | 166.8138  | 223.5359  |
| 318.3338  | 398.4345  | 498.1665  |
| 559.9697  | 654.0177  | 805.8163  |
| 891.1885  | 913.3768  | 1097.5411 |
| 1129.2106 | 1264.4333 | 1394.3161 |
| 1405.1294 | 1465.7502 | 1472.1872 |
| 1477.8583 | 1501.4934 | 1674.7694 |
| 1825.5976 | 3041.7677 | 3049.2668 |
| 3113.7875 | 3120.5699 | 3161.5391 |
| 3169.4080 | 3763.7976 | 3957.4475 |

---

---

---

**P1, CH<sub>3</sub>C(OH)CH<sub>2</sub>·H<sub>2</sub>O**

|   |           |           |           |
|---|-----------|-----------|-----------|
| C | -0.328959 | 1.348812  | -0.162279 |
| C | -0.757938 | 0.085023  | -0.083547 |
| O | 0.012088  | -1.002449 | -0.311123 |
| C | -2.159883 | -0.308327 | 0.261524  |
| H | -1.006138 | 2.167098  | 0.039699  |
| H | 0.680263  | 1.590222  | -0.476284 |
| H | 2.308818  | 0.484931  | 0.859912  |
| H | -2.163285 | -0.943714 | 1.151420  |
| H | -2.589365 | -0.892233 | -0.557237 |
| H | -2.785677 | 0.565587  | 0.440807  |
| O | 2.597832  | -0.038029 | 0.108381  |
| H | 3.218003  | -0.676350 | 0.463240  |
| H | 0.938695  | -0.724764 | -0.393811 |

## Frequencies

|           |           |           |
|-----------|-----------|-----------|
| 35.8064   | 106.0116  | 153.5592  |
| 183.1496  | 204.0923  | 286.2667  |
| 362.1544  | 428.4540  | 518.0219  |
| 539.8549  | 716.7164  | 786.4634  |
| 835.6364  | 884.9228  | 1000.6809 |
| 1038.2082 | 1077.0688 | 1304.2188 |
| 1411.9283 | 1428.5300 | 1476.0123 |
| 1494.1734 | 1505.9885 | 1632.6027 |
| 1736.9915 | 3049.5509 | 3114.3444 |
| 3154.4317 | 3166.6708 | 3260.5593 |
| 3688.8976 | 3875.7821 | 3983.3154 |

---

**TS1**

|   |           |           |           |
|---|-----------|-----------|-----------|
| C | 0.040877  | 1.272258  | -0.197644 |
| C | -0.589685 | 0.009702  | -0.150292 |
| O | 0.054750  | -1.054115 | -0.428403 |
| C | -2.002503 | -0.160158 | 0.327468  |
| H | -0.522693 | 2.127830  | 0.156786  |
| H | 0.628187  | 1.469462  | -1.094496 |
| H | 1.288482  | 0.754934  | 0.343588  |
| H | -2.121745 | -1.117524 | 0.835300  |
| H | -2.662691 | -0.152244 | -0.545676 |
| H | -2.304717 | 0.661338  | 0.978492  |
| O | 2.121703  | -0.104932 | 0.245962  |
| H | 2.357307  | -0.455360 | 1.107835  |
| H | 1.234113  | -0.746864 | -0.199501 |

## Frequencies

|            |          |          |
|------------|----------|----------|
| -1894.9220 | 118.4046 | 124.7542 |
| 373.9518   | 465.3423 | 501.2940 |
| 559.3909   | 587.7429 | 619.6087 |

---

---

|           |           |           |
|-----------|-----------|-----------|
| 721.9188  | 764.2422  | 829.0781  |
| 882.6548  | 1002.5008 | 1042.7039 |
| 1096.9712 | 1168.9084 | 1327.9344 |
| 1382.5812 | 1420.0360 | 1466.2941 |
| 1480.7788 | 1499.4627 | 1530.0218 |
| 1591.4864 | 1679.9564 | 1933.1042 |
| 3056.9981 | 3123.1253 | 3131.4291 |
| 3165.6345 | 3220.4339 | 3909.4875 |

---

**R2**, CH<sub>3</sub>C(O)CH<sub>3</sub>·(H<sub>2</sub>O)<sub>2</sub>

|   |           |           |           |
|---|-----------|-----------|-----------|
| O | -2.263614 | 1.412655  | -0.427760 |
| H | -2.327652 | 1.435391  | -1.382350 |
| C | 0.535345  | 0.773541  | 1.020602  |
| C | 1.248155  | -0.139752 | 0.061082  |
| O | 0.753577  | -1.185828 | -0.310675 |
| C | 2.593685  | 0.301968  | -0.450684 |
| H | 0.065325  | 0.183935  | 1.809544  |
| H | 1.197512  | 1.522522  | 1.456281  |
| H | 2.959203  | -0.391841 | -1.205826 |
| H | 3.301153  | 0.353400  | 0.382795  |
| H | 2.518566  | 1.311344  | -0.865966 |
| H | -0.275730 | 1.275074  | 0.474465  |
| O | -2.007728 | -1.312214 | 0.092698  |
| H | -2.187220 | -1.677763 | 0.958365  |
| H | -2.323144 | 0.467063  | -0.209370 |
| H | -1.049003 | -1.410571 | -0.038049 |

Frequencies

|           |           |           |
|-----------|-----------|-----------|
| 30.0781   | 58.8940   | 85.7965   |
| 123.9783  | 148.7993  | 182.6117  |
| 195.5879  | 200.1645  | 234.7920  |
| 262.1524  | 367.0018  | 398.5877  |
| 463.5375  | 513.0912  | 550.6592  |
| 664.6726  | 806.0459  | 838.7264  |
| 896.0110  | 944.6303  | 1090.2869 |
| 1121.6400 | 1263.3110 | 1394.6422 |
| 1412.9517 | 1465.1046 | 1476.2672 |
| 1487.1753 | 1500.6418 | 1666.1749 |
| 1687.2565 | 1809.3342 | 3011.2794 |
| 3046.6576 | 3111.3427 | 3116.2511 |
| 3155.6562 | 3170.2891 | 3636.5479 |
| 3690.6747 | 3957.9040 | 3967.6404 |

---

**P2**, CH<sub>3</sub>C(OH)CH<sub>2</sub>·(H<sub>2</sub>O)<sub>2</sub>

|   |           |           |           |
|---|-----------|-----------|-----------|
| O | -1.653957 | 1.577689  | -0.423159 |
| H | -1.394947 | 1.602955  | -1.345823 |
| C | 0.632589  | 0.319045  | 1.320780  |
| C | 1.107670  | -0.173235 | 0.165437  |

---

---

|   |           |           |           |
|---|-----------|-----------|-----------|
| O | 0.444110  | -1.013502 | -0.642898 |
| C | 2.459360  | 0.159880  | -0.385169 |
| H | -0.327893 | 0.006138  | 1.712355  |
| H | 1.240953  | 0.977215  | 1.925347  |
| H | 2.361643  | 0.586471  | -1.387075 |
| H | 3.048849  | -0.755821 | -0.479550 |
| H | 2.991460  | 0.862003  | 0.255983  |
| H | -0.817437 | 1.534451  | 0.062968  |
| O | -2.170715 | -1.075058 | 0.075925  |
| H | -2.561412 | -1.254956 | 0.930482  |
| H | -2.240045 | -0.112548 | -0.063174 |
| H | -0.454390 | -1.193077 | -0.296745 |

Frequencies

|           |           |           |
|-----------|-----------|-----------|
| 39.0128   | 77.2780   | 131.0755  |
| 158.4091  | 181.0715  | 214.5886  |
| 235.3113  | 245.8895  | 293.5566  |
| 309.5852  | 430.8060  | 493.6229  |
| 523.4601  | 537.9877  | 547.8276  |
| 747.1400  | 792.5144  | 831.0555  |
| 884.3404  | 981.0690  | 1001.7590 |
| 1041.8680 | 1076.6585 | 1307.2852 |
| 1410.2061 | 1430.5352 | 1475.4661 |
| 1490.5588 | 1498.4115 | 1653.3251 |
| 1659.6700 | 1716.3100 | 3052.4545 |
| 3118.5595 | 3157.0709 | 3172.0934 |
| 3266.9438 | 3506.2836 | 3624.5507 |
| 3739.9379 | 3946.4957 | 3968.8197 |

---

**TS2**

|   |           |           |           |
|---|-----------|-----------|-----------|
| O | -1.699005 | 1.267331  | -0.489782 |
| H | -1.587741 | 1.418717  | -1.430842 |
| C | 0.472480  | 0.914578  | 0.929730  |
| C | 1.044866  | -0.125316 | 0.177047  |
| O | 0.475472  | -1.233074 | -0.062514 |
| C | 2.394853  | 0.065883  | -0.468978 |
| H | -0.216019 | 0.614201  | 1.718662  |
| H | 1.106914  | 1.757669  | 1.182113  |
| H | 2.379779  | -0.332782 | -1.484748 |
| H | 3.129227  | -0.512119 | 0.099908  |
| H | 2.708717  | 1.110274  | -0.475342 |
| H | -0.679208 | 1.291457  | 0.022687  |
| O | -1.928135 | -1.054162 | 0.032183  |
| H | -2.325906 | -1.212767 | 0.888822  |
| H | -1.940668 | 0.125642  | -0.267686 |
| H | -0.834948 | -1.231919 | 0.080527  |

---

---



---

| Frequencies |           |           |
|-------------|-----------|-----------|
| -1563.4525  | 69.2758   | 102.3644  |
| 106.3293    | 173.4542  | 376.1070  |
| 395.6707    | 418.1767  | 496.5235  |
| 528.5967    | 562.0996  | 615.0470  |
| 633.7429    | 643.8013  | 706.8317  |
| 767.4122    | 849.1832  | 871.3277  |
| 999.1052    | 1047.2176 | 1089.8015 |
| 1172.9196   | 1313.7276 | 1362.4772 |
| 1397.2215   | 1435.1531 | 1467.2191 |
| 1481.6594   | 1508.2975 | 1541.5129 |
| 1589.1343   | 1660.3841 | 1710.9307 |
| 1779.0309   | 1843.5946 | 3059.1341 |
| 3123.1621   | 3134.0731 | 3158.6736 |
| 3212.5358   | 3914.8460 | 3946.4875 |

---

| <b>R3</b> , CH <sub>3</sub> C(O)CH <sub>3</sub> ·(H <sub>2</sub> O) <sub>3</sub> |           |           |           |
|----------------------------------------------------------------------------------|-----------|-----------|-----------|
| O                                                                                | 0.132863  | 2.040051  | -0.505067 |
| H                                                                                | 0.081234  | 1.912367  | -1.452584 |
| H                                                                                | 0.986379  | 0.661928  | 1.877864  |
| C                                                                                | 0.624698  | -0.261499 | 1.426789  |
| C                                                                                | 1.255081  | -0.497987 | 0.077023  |
| O                                                                                | 0.706158  | -1.171432 | -0.774422 |
| C                                                                                | 2.618478  | 0.087925  | -0.151346 |
| H                                                                                | -0.458176 | -0.222048 | 1.324398  |
| H                                                                                | 0.893675  | -1.100301 | 2.078641  |
| H                                                                                | 3.039165  | -0.281397 | -1.085408 |
| H                                                                                | 3.282752  | -0.144226 | 0.685956  |
| H                                                                                | 2.496570  | 1.173393  | -0.193048 |
| O                                                                                | -1.982535 | -1.579839 | -0.383045 |
| H                                                                                | -2.084322 | -2.310109 | 0.226315  |
| H                                                                                | -1.029292 | -1.547285 | -0.595160 |
| H                                                                                | -2.382439 | 0.106888  | -0.009487 |
| O                                                                                | -2.383358 | 1.063085  | 0.187746  |
| H                                                                                | -2.842542 | 1.162058  | 1.020540  |
| H                                                                                | -0.757570 | 1.803188  | -0.194522 |

| Frequencies |          |           |
|-------------|----------|-----------|
| 41.1800     | 65.7447  | 76.2892   |
| 97.0629     | 108.6944 | 118.9635  |
| 148.9966    | 169.1855 | 197.5638  |
| 206.7886    | 228.1717 | 246.4648  |
| 252.8162    | 276.4639 | 368.4378  |
| 400.6943    | 447.6077 | 491.0581  |
| 546.8672    | 562.6565 | 680.4393  |
| 754.6271    | 806.4284 | 877.6061  |
| 906.5640    | 940.7528 | 1094.8088 |

---

---

|           |           |           |
|-----------|-----------|-----------|
| 1123.6783 | 1266.8688 | 1387.8148 |
| 1405.0098 | 1466.2002 | 1471.5532 |
| 1482.2599 | 1498.4477 | 1670.8468 |
| 1687.3373 | 1697.6131 | 1806.9347 |
| 3048.6062 | 3052.1206 | 3130.3434 |
| 3139.9165 | 3169.1433 | 3184.4865 |
| 3545.4079 | 3613.3910 | 3680.4300 |
| 3952.7815 | 3967.8299 | 3973.9560 |

---

**P3**, CH<sub>3</sub>C(OH)CH<sub>2</sub>·(H<sub>2</sub>O)<sub>3</sub>

|   |           |           |           |
|---|-----------|-----------|-----------|
| O | -0.684412 | 1.868316  | -0.593280 |
| H | -0.320740 | 1.296997  | -1.277276 |
| H | -0.091490 | 1.700105  | 0.149661  |
| C | 0.873794  | -0.135687 | 1.396447  |
| C | 1.484630  | -0.210304 | 0.205837  |
| O | 0.889967  | -0.647207 | -0.923676 |
| C | 2.893244  | 0.225567  | -0.047589 |
| H | -0.150120 | -0.468498 | 1.515933  |
| H | 1.412888  | 0.207735  | 2.268591  |
| H | 2.908804  | 1.004617  | -0.815143 |
| H | 3.476005  | -0.616742 | -0.428896 |
| H | 3.363007  | 0.607765  | 0.858315  |
| O | -1.489363 | -1.738148 | -0.352745 |
| H | -1.548190 | -2.451630 | 0.281571  |
| H | 0.031821  | -1.083289 | -0.712619 |
| H | -2.107269 | -1.040271 | -0.052226 |
| O | -2.870815 | 0.478564  | 0.330955  |
| H | -3.037029 | 0.772603  | 1.226088  |
| H | -2.210714 | 1.100945  | -0.032197 |

Frequencies

|           |           |           |
|-----------|-----------|-----------|
| 34.6909   | 56.2036   | 60.0889   |
| 100.5997  | 130.5001  | 180.8361  |
| 183.2893  | 224.3933  | 242.8117  |
| 256.7564  | 259.2569  | 277.1800  |
| 290.3716  | 365.9861  | 428.6054  |
| 497.9260  | 528.4641  | 540.9207  |
| 560.4671  | 624.3563  | 725.9231  |
| 751.7994  | 820.2907  | 855.2427  |
| 885.1849  | 1000.2483 | 1033.9505 |
| 1053.4576 | 1079.1137 | 1314.7901 |
| 1411.8355 | 1422.2280 | 1476.2327 |
| 1491.7317 | 1503.9942 | 1677.8933 |
| 1684.5655 | 1703.1489 | 1722.0918 |
| 3050.9458 | 3117.3434 | 3156.0753 |
| 3171.9182 | 3268.4103 | 3389.6866 |
| 3529.1923 | 3597.5796 | 3806.5648 |

---

|                                                                          | 3891.5462 | 3966.0377 | 3970.5331 |
|--------------------------------------------------------------------------|-----------|-----------|-----------|
| <b>TS3</b>                                                               |           |           |           |
| O                                                                        | 0.836883  | 1.951816  | 0.209325  |
| H                                                                        | 0.477792  | 2.150469  | 1.076955  |
| H                                                                        | 0.064821  | 1.422862  | -0.345816 |
| C                                                                        | -0.854219 | 0.432919  | -1.205677 |
| C                                                                        | -1.425887 | -0.237689 | -0.120313 |
| O                                                                        | -0.877037 | -1.170285 | 0.538884  |
| C                                                                        | -2.773244 | 0.215119  | 0.399369  |
| H                                                                        | -0.036051 | -0.057613 | -1.729382 |
| H                                                                        | -1.490267 | 1.064945  | -1.816110 |
| H                                                                        | -2.710568 | 0.378487  | 1.477824  |
| H                                                                        | -3.495704 | -0.589598 | 0.238214  |
| H                                                                        | -3.135685 | 1.118323  | -0.093426 |
| O                                                                        | 1.413401  | -1.761654 | -0.090679 |
| H                                                                        | 1.411594  | -2.136595 | -0.971316 |
| H                                                                        | 0.393268  | -1.549325 | 0.166646  |
| H                                                                        | 2.113517  | -0.648147 | 0.081114  |
| O                                                                        | 2.587546  | 0.321342  | 0.286756  |
| H                                                                        | 3.273367  | 0.505662  | -0.355877 |
| H                                                                        | 1.767672  | 1.148680  | 0.276615  |
| Frequencies                                                              |           |           |           |
| -1101.1789                                                               | 41.8804   | 78.0259   |           |
| 93.3127                                                                  | 112.7206  | 136.7226  |           |
| 156.1908                                                                 | 325.3637  | 362.9665  |           |
| 387.3985                                                                 | 402.9528  | 471.2057  |           |
| 484.2237                                                                 | 547.4066  | 564.4771  |           |
| 594.8418                                                                 | 633.2741  | 655.7461  |           |
| 687.0627                                                                 | 702.5376  | 800.5369  |           |
| 858.8160                                                                 | 873.3081  | 1004.9825 |           |
| 1056.3676                                                                | 1088.7940 | 1121.2025 |           |
| 1235.0970                                                                | 1296.1367 | 1361.3028 |           |
| 1406.3400                                                                | 1475.4764 | 1484.5599 |           |
| 1492.4828                                                                | 1545.2745 | 1561.5631 |           |
| 1619.2598                                                                | 1679.6432 | 1727.3953 |           |
| 1773.2438                                                                | 1830.7405 | 1898.9257 |           |
| 2095.9545                                                                | 3057.2735 | 3121.4497 |           |
| 3130.1715                                                                | 3154.0591 | 3212.7055 |           |
| 3915.6591                                                                | 3946.6844 | 3950.9369 |           |
| <b>R4, CH<sub>3</sub>C(O)CH<sub>3</sub>·(H<sub>2</sub>O)<sub>4</sub></b> |           |           |           |
| O                                                                        | 0.093465  | 1.838235  | 1.213973  |
| H                                                                        | 0.017188  | 2.709998  | 1.601186  |
| H                                                                        | 0.931909  | -0.405856 | 1.841861  |
| C                                                                        | 1.239194  | -1.223550 | 1.181342  |
| C                                                                        | 1.376098  | -0.627852 | -0.189899 |



---

|                                                                           |           |           |           |
|---------------------------------------------------------------------------|-----------|-----------|-----------|
| O                                                                         | 0.578295  | -0.870615 | -1.080790 |
| C                                                                         | 2.496394  | 0.348716  | -0.404860 |
| H                                                                         | 0.480359  | -2.004481 | 1.196340  |
| H                                                                         | 2.197257  | -1.603783 | 1.542700  |
| H                                                                         | 2.546599  | 0.648998  | -1.450358 |
| H                                                                         | 3.450655  | -0.075843 | -0.083856 |
| H                                                                         | 2.287913  | 1.219845  | 0.223813  |
| O                                                                         | -1.662612 | -2.126443 | -0.050770 |
| H                                                                         | -2.201089 | -2.658732 | -0.635799 |
| H                                                                         | -0.906387 | -1.817075 | -0.578470 |
| O                                                                         | -2.409590 | 0.511138  | 0.496099  |
| H                                                                         | -1.728003 | 0.800560  | 1.114522  |
| H                                                                         | -2.287693 | -0.448969 | 0.416721  |
| H                                                                         | -0.102842 | 1.955096  | 0.260363  |
| O                                                                         | -0.784930 | 1.703482  | -1.367311 |
| H                                                                         | -0.313427 | 0.948089  | -1.731695 |
| H                                                                         | -1.559577 | 1.301889  | -0.926431 |
| Frequencies                                                               |           |           |           |
| 36.6384                                                                   | 52.5336   | 71.3077   |           |
| 95.4330                                                                   | 105.5281  | 110.6062  |           |
| 145.9467                                                                  | 150.0704  | 156.9933  |           |
| 178.6942                                                                  | 201.1180  | 219.7177  |           |
| 230.8657                                                                  | 256.5956  | 266.9663  |           |
| 281.9999                                                                  | 401.7244  | 410.2301  |           |
| 413.4460                                                                  | 451.2319  | 500.0349  |           |
| 556.1242                                                                  | 564.3747  | 582.5914  |           |
| 603.4230                                                                  | 661.7375  | 768.2035  |           |
| 819.8193                                                                  | 857.8502  | 886.3902  |           |
| 929.2765                                                                  | 1045.1527 | 1105.1158 |           |
| 1134.9303                                                                 | 1275.8934 | 1394.1418 |           |
| 1403.6386                                                                 | 1468.2343 | 1473.1791 |           |
| 1483.8306                                                                 | 1496.5961 | 1657.7996 |           |
| 1673.3370                                                                 | 1691.0281 | 1707.0452 |           |
| 1793.0343                                                                 | 3047.2824 | 3052.6609 |           |
| 3124.4442                                                                 | 3131.3136 | 3168.7571 |           |
| 3171.7043                                                                 | 3483.0001 | 3588.3273 |           |
| 3643.4194                                                                 | 3707.0849 | 3830.1673 |           |
| 3877.7119                                                                 | 3960.5077 | 3966.0009 |           |
| <hr/>                                                                     |           |           |           |
| <b>P4, CH<sub>3</sub>C(OH)CH<sub>2</sub>·(H<sub>2</sub>O)<sub>4</sub></b> |           |           |           |
| O                                                                         | -0.638637 | 2.902178  | -0.409758 |
| H                                                                         | -1.310321 | 3.205439  | 0.202616  |
| H                                                                         | -0.995542 | 2.089167  | -0.789713 |
| C                                                                         | -0.735729 | -0.159586 | -1.226819 |
| C                                                                         | -1.339227 | -0.510548 | -0.076108 |
| O                                                                         | -0.788308 | -0.380538 | 1.139441  |
| C                                                                         | -2.698757 | -1.134204 | -0.008208 |

---

---

|   |           |           |           |
|---|-----------|-----------|-----------|
| H | 0.274116  | 0.234593  | -1.230366 |
| H | -1.241055 | -0.299173 | -2.173069 |
| H | -3.359334 | -0.517601 | 0.606593  |
| H | -2.628575 | -2.111674 | 0.476838  |
| H | -3.135960 | -1.258423 | -0.998607 |
| O | 1.269864  | -2.307107 | 0.072253  |
| H | 0.592347  | -2.143866 | -0.592647 |
| H | 0.834706  | -2.032082 | 0.885440  |
| O | 2.905363  | -0.128673 | -0.468383 |
| H | 3.140974  | -0.114120 | -1.394976 |
| H | 2.474870  | -0.988459 | -0.308325 |
| H | 0.756447  | 2.070858  | 0.551700  |
| O | 1.169719  | 1.344335  | 1.044106  |
| H | -0.003813 | 0.240317  | 1.116687  |
| H | 1.899412  | 1.009476  | 0.493370  |

Frequencies

|           |           |           |
|-----------|-----------|-----------|
| 39.0847   | 58.5108   | 64.1985   |
| 72.5896   | 91.4771   | 131.6118  |
| 146.7840  | 175.6413  | 181.2073  |
| 194.8942  | 218.7389  | 222.0621  |
| 229.0549  | 241.9050  | 255.6430  |
| 269.2900  | 309.3426  | 359.9764  |
| 435.5946  | 478.5246  | 491.5743  |
| 536.8032  | 557.1292  | 574.3137  |
| 659.3219  | 713.5709  | 755.1933  |
| 767.5362  | 839.8882  | 858.8399  |
| 887.7069  | 1007.2441 | 1041.0440 |
| 1073.2514 | 1161.5568 | 1334.9533 |
| 1420.3957 | 1429.1917 | 1475.1501 |
| 1492.6574 | 1525.1660 | 1642.0457 |
| 1674.7969 | 1675.6713 | 1692.7426 |
| 1705.2612 | 3052.6233 | 3095.1296 |
| 3119.2647 | 3156.7811 | 3165.1752 |
| 3263.5659 | 3603.0242 | 3657.3639 |
| 3721.8960 | 3788.2795 | 3836.4065 |
| 3903.8896 | 3955.8399 | 3975.1935 |

**TS4**

---

|   |          |           |           |
|---|----------|-----------|-----------|
| O | 0.218480 | 2.285063  | 0.552848  |
| H | 0.895680 | 2.889629  | 0.242121  |
| H | 0.707267 | 1.348193  | 0.931576  |
| C | 1.100301 | -0.093681 | 1.317702  |
| C | 1.493442 | -0.494188 | 0.034519  |
| O | 0.682968 | -0.833511 | -0.882492 |
| C | 2.954173 | -0.438960 | -0.353680 |
| H | 0.104819 | -0.395901 | 1.638095  |

---

---

|   |           |           |           |
|---|-----------|-----------|-----------|
| H | 1.853715  | -0.025245 | 2.095922  |
| H | 3.061561  | 0.116546  | -1.288371 |
| H | 3.296291  | -1.459092 | -0.548396 |
| H | 3.584476  | 0.003287  | 0.419156  |
| O | -1.458937 | -2.086450 | 0.199327  |
| H | -1.137761 | -2.627285 | 0.919807  |
| H | -0.656162 | -1.727378 | -0.241939 |
| O | -2.996356 | 0.101209  | 0.172089  |
| H | -3.096375 | 0.454764  | 1.056144  |
| H | -2.583493 | -0.783135 | 0.281193  |
| H | -0.420712 | 1.837893  | -0.340132 |
| O | -1.020197 | 1.192821  | -1.181787 |
| H | -0.446193 | 0.391768  | -1.277182 |
| H | -1.858287 | 0.863872  | -0.759111 |

Frequencies

|            |           |           |
|------------|-----------|-----------|
| -1151.5063 | 24.1463   | 48.3123   |
| 75.2119    | 81.4212   | 108.8189  |
| 121.4316   | 138.2970  | 198.0650  |
| 226.1843   | 262.7775  | 293.4725  |
| 319.5084   | 331.2552  | 417.7887  |
| 452.4439   | 473.8235  | 512.3051  |
| 541.5494   | 554.4991  | 576.2654  |
| 617.4626   | 643.9794  | 683.3142  |
| 741.4538   | 825.8465  | 855.7029  |
| 868.4678   | 893.1177  | 949.7393  |
| 997.6621   | 1033.5744 | 1056.9173 |
| 1089.1840  | 1238.1733 | 1330.9252 |
| 1399.5378  | 1471.3381 | 1483.6717 |
| 1491.6583  | 1512.9082 | 1583.8613 |
| 1659.0255  | 1676.2361 | 1693.7332 |
| 1702.1649  | 1753.8708 | 1810.7023 |
| 3058.4548  | 3125.9694 | 3131.9185 |
| 3154.2571  | 3219.5527 | 3249.2962 |
| 3357.8431  | 3431.0681 | 3513.6859 |
| 3917.6492  | 3956.3965 | 3967.8667 |

---

**R5**, CH<sub>3</sub>C(O)CH<sub>3</sub>·(H<sub>2</sub>O)<sub>5</sub>

|   |           |           |           |
|---|-----------|-----------|-----------|
| O | 0.699002  | 1.108780  | 1.658158  |
| H | 0.712289  | 1.643453  | 2.451858  |
| H | 1.117183  | -2.610708 | 1.165651  |
| C | 0.513621  | -2.048926 | 0.453545  |
| C | 1.316475  | -1.036440 | -0.306344 |
| O | 0.836873  | -0.449894 | -1.267916 |
| C | 2.710486  | -0.743104 | 0.155583  |
| H | -0.283206 | -1.523632 | 0.994982  |
| H | 0.024817  | -2.731272 | -0.245504 |

---

---



---

|   |           |           |           |
|---|-----------|-----------|-----------|
| H | 3.183846  | -0.001713 | -0.486623 |
| H | 3.299134  | -1.664713 | 0.170591  |
| H | 2.646188  | -0.364534 | 1.178833  |
| O | 0.928420  | 2.412051  | -0.731888 |
| H | -0.038476 | 2.460417  | -0.649979 |
| H | 1.069962  | 1.607256  | -1.243915 |
| H | 0.994310  | 1.692407  | 0.930695  |
| O | -1.658573 | 1.675750  | 0.150774  |
| H | -1.856545 | 0.982791  | -0.495499 |
| H | -1.043423 | 1.262096  | 0.775188  |
| O | -2.531325 | -1.048596 | 1.212224  |
| H | -2.736363 | -0.120807 | 1.348520  |
| H | -2.504704 | -1.126319 | 0.250452  |
| O | -1.865901 | -0.602029 | -1.518438 |
| H | -0.891162 | -0.646558 | -1.574221 |
| H | -2.205303 | -0.655840 | -2.411048 |

Frequencies

|           |           |           |
|-----------|-----------|-----------|
| 45.6764   | 62.1323   | 64.1537   |
| 70.0399   | 84.4352   | 112.7429  |
| 118.2946  | 120.6913  | 153.0717  |
| 159.1789  | 173.5995  | 182.6938  |
| 190.0953  | 208.5263  | 218.5322  |
| 226.6573  | 253.3835  | 260.3037  |
| 302.7774  | 330.0075  | 376.6258  |
| 396.3333  | 406.8030  | 431.0414  |
| 443.0437  | 513.9710  | 556.1186  |
| 571.6776  | 599.1736  | 652.1645  |
| 697.4227  | 701.5776  | 759.4539  |
| 816.4975  | 858.0422  | 892.0539  |
| 960.9949  | 1026.3506 | 1093.5940 |
| 1122.9064 | 1276.9979 | 1394.2733 |
| 1400.3853 | 1465.5775 | 1479.5976 |
| 1488.3037 | 1496.2573 | 1645.3269 |
| 1661.3854 | 1681.9865 | 1696.4318 |
| 1709.3965 | 1776.3535 | 3031.6569 |
| 3053.4431 | 3115.2110 | 3133.5302 |
| 3160.9795 | 3169.4706 | 3534.7974 |
| 3548.2581 | 3688.8516 | 3726.9481 |
| 3773.2782 | 3812.3599 | 3844.6824 |
| 3925.6529 | 3960.4761 | 3971.0234 |

---

**P5**, CH<sub>3</sub>C(OH)CH<sub>2</sub>·(H<sub>2</sub>O)<sub>5</sub>

|   |           |           |          |
|---|-----------|-----------|----------|
| O | -0.002421 | 0.679273  | 1.995030 |
| H | 0.699512  | 0.040204  | 1.837780 |
| H | -0.817338 | 0.158940  | 1.905737 |
| C | 2.043482  | -1.619305 | 0.323343 |

---

---

|   |           |           |           |
|---|-----------|-----------|-----------|
| C | 1.962047  | -0.423399 | -0.261433 |
| O | 0.955231  | -0.150360 | -1.136921 |
| C | 2.939783  | 0.694984  | -0.065403 |
| H | 1.292675  | -2.378326 | 0.137800  |
| H | 2.879780  | -1.866281 | 0.962928  |
| H | 2.426650  | 1.591826  | 0.293285  |
| H | 3.404348  | 0.949342  | -1.021892 |
| H | 3.716397  | 0.421635  | 0.648630  |
| O | -0.126668 | 2.085964  | -0.404095 |
| H | -1.058341 | 1.937244  | -0.649988 |
| H | 0.627094  | 0.787585  | -0.996114 |
| H | -0.093609 | 1.819871  | 0.533772  |
| O | -2.648888 | 0.999881  | -0.858279 |
| H | -2.388217 | 0.197685  | -1.326580 |
| H | -2.833925 | 0.661647  | 0.026615  |
| O | -2.251217 | -0.817233 | 1.301527  |
| H | -2.765244 | -1.418156 | 1.839458  |
| H | -1.943884 | -1.312885 | 0.518944  |
| O | -1.312803 | -1.555154 | -1.122905 |
| H | -0.428882 | -1.126204 | -1.183106 |
| H | -1.294755 | -2.316774 | -1.701167 |

Frequencies

|           |           |           |
|-----------|-----------|-----------|
| 47.2793   | 58.6488   | 70.9944   |
| 77.9094   | 86.1108   | 110.0908  |
| 124.1502  | 136.2118  | 185.0378  |
| 191.0531  | 212.4202  | 223.1347  |
| 236.3456  | 254.4180  | 261.8796  |
| 271.6734  | 290.2139  | 303.2576  |
| 374.0229  | 398.7539  | 433.5280  |
| 456.4866  | 498.1277  | 512.7807  |
| 525.7724  | 546.7404  | 580.6189  |
| 595.2620  | 708.8419  | 743.3143  |
| 753.7058  | 772.6844  | 807.8863  |
| 852.7766  | 860.7753  | 874.8648  |
| 921.0295  | 996.1346  | 1036.2430 |
| 1068.0675 | 1081.9568 | 1326.1928 |
| 1416.4239 | 1435.5513 | 1477.9524 |
| 1494.0987 | 1557.5817 | 1656.2637 |
| 1674.9898 | 1691.4012 | 1717.0852 |
| 1745.2861 | 1759.0985 | 3043.5535 |
| 3051.1913 | 3118.0066 | 3154.5310 |
| 3168.7625 | 3265.6897 | 3420.8369 |
| 3598.7869 | 3624.0456 | 3641.6743 |
| 3715.7035 | 3808.9162 | 3859.9934 |
| 3873.2800 | 3970.3900 | 3973.6327 |

---

---

---

**TS5**

|   |           |           |           |
|---|-----------|-----------|-----------|
| O | 1.707122  | 1.471142  | 1.197264  |
| H | 2.639454  | 1.495471  | 1.424401  |
| H | 1.342957  | 0.469017  | 1.327410  |
| C | 0.620391  | -1.028466 | 1.355149  |
| C | 0.949504  | -1.140912 | 0.023416  |
| O | 0.295260  | -0.558457 | -0.929759 |
| C | 2.198524  | -1.876149 | -0.405797 |
| H | -0.368545 | -0.662141 | 1.626788  |
| H | 1.148626  | -1.633381 | 2.084310  |
| H | 2.856707  | -1.199639 | -0.960175 |
| H | 1.914833  | -2.673309 | -1.097674 |
| H | 2.744783  | -2.309517 | 0.432922  |
| O | 1.189733  | 1.899110  | -1.118960 |
| H | 0.271626  | 2.239772  | -1.088198 |
| H | 1.021503  | 0.949496  | -1.358039 |
| H | 1.511030  | 1.747871  | 0.101382  |
| O | -1.383394 | 1.613857  | -0.536964 |
| H | -2.176660 | 1.458751  | -1.054788 |
| H | -0.954321 | 0.735209  | -0.515313 |
| O | -2.614338 | 0.000416  | 1.614144  |
| H | -2.307262 | 0.856755  | 1.304716  |
| H | -2.667061 | -0.507632 | 0.792085  |
| O | -2.381630 | -1.119069 | -1.042437 |
| H | -1.409219 | -1.137540 | -1.114338 |
| H | -2.680991 | -2.012016 | -1.208387 |

**Frequencies**

|           |           |           |
|-----------|-----------|-----------|
| -697.4828 | 34.0930   | 58.8356   |
| 69.5737   | 84.3632   | 102.3268  |
| 120.6561  | 134.7412  | 141.9633  |
| 148.7912  | 159.6099  | 201.0831  |
| 211.7111  | 238.0609  | 243.8180  |
| 328.6209  | 346.0354  | 390.4713  |
| 444.4603  | 450.9147  | 457.4393  |
| 471.5250  | 498.7321  | 538.2455  |
| 555.4317  | 588.6384  | 606.6579  |
| 626.5804  | 652.7140  | 717.1667  |
| 745.1388  | 772.4652  | 820.8103  |
| 869.0879  | 880.4048  | 923.7360  |
| 1005.2029 | 1022.0099 | 1063.8746 |
| 1081.3406 | 1164.8635 | 1361.8641 |
| 1420.4017 | 1462.8478 | 1478.6261 |
| 1491.0553 | 1549.9714 | 1601.9385 |
| 1656.8424 | 1690.8107 | 1705.0719 |
| 1731.4117 | 1753.1977 | 1789.9450 |

---

---

---

|           |           |           |
|-----------|-----------|-----------|
| 2032.1046 | 3051.3712 | 3121.2586 |
| 3124.9671 | 3153.3115 | 3231.7892 |
| 3312.3412 | 3543.1700 | 3589.8244 |
| 3623.9568 | 3771.4198 | 3901.8088 |
| 3917.8042 | 3925.4816 | 3969.1528 |

---

## References

- 1 N. F. Kleimeier, A. M. Turner, R. C. Fortenberry and R. I. Kaiser, *ChemPhysChem*, 2020, **21**, 1531-1540.
- 2 C. Zhu, N. F. Kleimeier, A. M. Turner, S. K. Singh, R. C. Fortenberry and R. I. Kaiser, *Proc. Natl. Acad. Sci. U.S.A.*, 2022, **119**, e2111938119.
- 3 W. G. M. P. J. Linstrom, *Natl. Inst. Stand. Technol*, 2013, <http://webbook.nist.gov/>.
- 4 R. L. Hudson, P. A. Gerakines and R. F. Ferrante, *Spectrochim. Acta - A: Mol. Biomol.*, 2018, **193**, 33-39.
- 5 W. C. Harris and I. W. Levin, *J. Mol. Spectrosc.*, 1972, **43**, 117-127.
- 6 X. K. Zhang, J. M. Parnis, E. G. Lewars and R. E. March, *Can. J. Chem.*, 1997, **75**, 276-284.
